Assessment of Immunogenicity and Efficacy of CV0501 mRNA-based Omicron COVID-19 Vaccination in Small Animal Models

# Assessment of Immunogenicity and Efficacy of CV0501 mRNA-based Omicron COVID-19 Vaccination in Small Animal Models

Nicole Roth<sup>1</sup>, Janina Gergen<sup>1</sup>, Kristina Kovacicova<sup>1</sup>, Stefan O. Mueller<sup>1</sup>, Lorenz Ulrich<sup>3</sup>, Jacob Schön<sup>3</sup>, Nico Joel Halwe<sup>3</sup>, Charlie Fricke<sup>4</sup>, Björn Corleis<sup>4</sup>, Anca Dorhoi<sup>4</sup>, Donata Hoffmann<sup>3</sup>, Martin Beer<sup>3</sup>, Domenico Maione<sup>2</sup>, Benjamin Petsch<sup>1#</sup>, Susanne Rauch<sup>1\*#</sup>

## Affiliations:

<sup>1</sup>CureVac SE, 72076 Tübingen, Germany.

<sup>2</sup>GSK, 53100 Siena, Italy.

<sup>3</sup>Institute of Diagnostic Virology, Friedrich-Loeffler-Institut, 17493 Greifswald-Insel Riems, Germany.

<sup>4</sup>Institute of Immunology, Friedrich-Loeffler-Institut, 17493 Greifswald-Insel Riems, Germany.

\*Author to whom correspondence should be addressed

#Co-senior authors

## Keywords

COVID-19 variant; SARS-CoV-2; mRNA vaccine; virus neutralizing antibody titer

Assessment of Immunogenicity and Efficacy of CV0501 mRNA-based Omicron COVID-19 Vaccination in Small Animal Models

1 **Abstract**

2 Severe acute respiratory syndrome coronavirus-2 (SARS-CoV-2) Omicron and its subvariants  
3 (BA.2, BA.4, BA.5) represent the most commonly circulating variants of concern (VOC) in the  
4 coronavirus disease 2019 (COVID-19) pandemic in 2022. Despite high vaccination rates with  
5 approved SARS-CoV-2 vaccines encoding the ancestral spike (S) protein, these Omicron  
6 subvariants have collectively resulted in increased viral transmission and disease incidence.  
7 This necessitates the development and characterization of vaccines incorporating later  
8 emerging S proteins to enhance protection against VOC. In this context, bivalent vaccine  
9 formulations may induce broad protection against VOC and potential future SARS-CoV-2  
10 variants. Here, we report preclinical data for a lipid nanoparticle (LNP)-formulated RNeasy®  
11 N1-methylpseudouridine (N1m $\Psi$ ) modified mRNA vaccine (CV0501) based on our second-  
12 generation SARS-CoV-2 vaccine CV2CoV, encoding the S protein of Omicron BA.1.

13 The immunogenicity of CV0501, alone or in combination with a corresponding vaccine  
14 encoding the ancestral S protein (ancestral N1m $\Psi$ ), was first measured in dose-response and  
15 booster immunization studies performed in Wistar rats. Both monovalent CV0501 and bivalent  
16 CV0501/ancestral N1m $\Psi$  immunization induced robust neutralizing antibody titers against the  
17 BA.1, BA.2 and BA.5 Omicron subvariants, in addition to other SARS-CoV-2 variants in a  
18 booster immunization study.

19 The protective efficacy of monovalent CV0501 against live SARS-CoV-2 BA.2 infection was  
20 then assessed in hamsters. Monovalent CV0501 significantly reduced SARS-CoV-2 BA.2 viral  
21 loads in the airways, demonstrating protection induced by CV0501 vaccination. CV0501 has  
22 now advanced into human Phase 1 clinical trials (ClinicalTrials.gov Identifier: NCT05477186).

23

## Assessment of Immunogenicity and Efficacy of CV0501 mRNA-based Omicron COVID-19 Vaccination in Small Animal Models

### 24 **Introduction**

25 Since detection in humans in December 2019, severe acute respiratory syndrome coronavirus  
26 2 (SARS-CoV-2) has spread globally to cause the coronavirus disease 2019 (COVID-19)  
27 pandemic. As of December 2022, it is estimated that COVID-19 has caused more than 6.6  
28 million deaths worldwide [1].

29 In this time, a multitude of SARS-CoV-2 variants have evolved, with some classed as variants  
30 of concern (VOC). The Omicron BA.1 variant, first detected in Botswana and South Africa in  
31 November 2021, has rapidly spread worldwide, and is characterised by a high mutational  
32 burden compared with other VOCs. Omicron BA.5 subvariant has quickly increased in global  
33 prevalence since it was first reported in February 2022 [2]. After being declared a VOC by the  
34 WHO in May 2022, the US FDA recommended that the Omicron BA.4/5 spike protein should  
35 be added to the current vaccine composition to create an updated two-component (bivalent)  
36 booster vaccines [3]. New Omicron subvariants have continued to emerge, including, BQ.1, a  
37 sub lineage of BA.5, and XBB, a recombinant of BA.2.10.1 and BA.2.75, both of which have  
38 altered antibody evasion properties [4]. Rapid antigenic drift in Omicron and its subvariants  
39 has led to increased transmissibility and evasion of humoral responses elicited by vaccines  
40 based on ancestral S protein, leading to pressing concerns around vaccine resistance and  
41 efficacy. [5-8]

42 Despite the successful implementation of mass COVID-19 vaccination programmes across  
43 the globe, Omicron and its subvariants continue to cause significant morbidity and mortality.  
44 As infection and reinfection in both vaccinated and unvaccinated individuals occurs increasing  
45 with SARS-CoV-2 variants, and reinfection being associated with more severe acute and post-  
46 acute sequelae compared with a primo-infection, SARS-CoV-2 continues to have significant  
47 global economic consequences [9-13].

48 BNT162b2 (Comirnaty, Pfizer/BioNTech) and mRNA-1273 (Spikevax, Moderna) monovalent  
49 mRNA COVID-19 vaccines, approved in December 2020 and April 2021 respectively, were  
50 generally well tolerated and highly effective at reducing the severity of COVID-19 symptoms  
51 caused by the ancestral strain [14,15]. However, the emergence of SARS-CoV-2 variants has  
52 highlighted the necessity of long-term protection and the need for booster doses, and the  
53 importance of developing SARS-CoV-2 variant-matched vaccines [16]. Bivalent mRNA  
54 vaccine boosters that include ancestral and either BA.1 or BA.4/5 components have recently  
55 been authorized in Europe, Australia and the United States.

56 The emergence of Omicron BA.1 prompted the development of CV0501, an RnActive®  
57 vaccine based on optimizations introduced in our second-generation SARS-CoV-2 vaccine  
58 CV2CoV [17-19]. CV0501 is a monovalent mRNA vaccine candidate using modified

## Assessment of Immunogenicity and Efficacy of CV0501 mRNA-based Omicron COVID-19 Vaccination in Small Animal Models

59 nucleosides, encoding the S protein of Omicron BA.1 and maintaining the same pre-fusion  
60 stabilizing mutations in S protein as previously described [17,20]. mRNA vaccines encoding  
61 for ancestral S protein (ancestral N1m $\Psi$ ) and a different BA.1 isolate (BA.1 nonclinical) were  
62 employed as comparators.

63 CV0501 immunogenicity as a primary vaccination was evaluated in a dose response study in  
64 Wistar rats and compared with immunization with BA.1 nonclinical and ancestral N1m $\Psi$   
65 vaccines. A further study in rats primed with ancestral N1m $\Psi$  evaluated neutralizing antibody  
66 (nAb) responses induced by boosting with monovalent CV0501, ancestral N1m $\Psi$  or a bivalent  
67 CV0501/ancestral N1m $\Psi$  vaccine. Immunogenicity and protective efficacy of CV0501 were  
68 evaluated in an Omicron BA.2 challenge model in Syrian hamsters.

69

Assessment of Immunogenicity and Efficacy of CV0501 mRNA-based Omicron COVID-19  
Vaccination in Small Animal Models

70 **Methods and Materials**

71 **Vaccines**

72 All vaccines tested were N1-methylpseudouridine (N1m $\Psi$ ) modified, mRNA-based vaccines  
73 that are formulated in identical lipid nanoparticles (LNP). mRNAs contain a cleanCap followed  
74 by the 5' UTR from the human hydroxysteroid 17-beta dehydrogenase 4 gene (HSD17B4) and  
75 a 3' UTR from the human proteasome 20S subunit beta 3 gene (PSMB3), followed by a histone  
76 stem-loop and a poly(A)<sub>100</sub> stretch. The constructs are formulated using LNP technology  
77 from Acuitas Therapeutics and composed of ionizable amino lipid, phospholipid and  
78 cholesterol and PEGylated lipid.

79 All mRNAs encode for full length, SARS-CoV-2 spike (S) protein containing stabilizing K986P  
80 and V987P mutations [20,21]. The S proteins encoded in the vaccines are either derived from  
81 ancestral (EPI\_ISL\_402124) or BA.1 SARS-CoV-2 variants. The initial Omicron BA.1 isolates  
82 featured had 15 mutations in their receptor binding domain (RBD), however, three of these,  
83 (K417N, N440K and G446S) are not conserved in all later isolates of this subvariant. Thus,  
84 the clinical candidate, CV0501, does not have these three mutations (EPI\_ISL\_6699769),  
85 while BA.1 nonclinical has the three mutations, but is otherwise identical to CV0501  
86 (EPI\_ISL\_6640916). The immunological characteristics of these two variants were compared  
87 to investigate the impact of the three mutations. All specific mutations are listed in [Table 1](#).

88 For the generation of the bivalent CV0501/ancestral N1m $\Psi$  vaccine, both vaccine components  
89 were mixed extemporaneously in a 1:1 ratio prior to injection.

90

## Assessment of Immunogenicity and Efficacy of CV0501 mRNA-based Omicron COVID-19 Vaccination in Small Animal Models

### 91 **Animal models**

92 Female Wistar rats, aged 7–8 weeks, provided and handled by Preclinics (Potsdam, Germany)  
93 were used for dose response and booster studies. Male Syrian hamsters aged 11 weeks  
94 (Janvier Labs, France), housed at the Friedrich-Loeffler-Institut, were used for the challenge  
95 studies. All procedures using SARS-CoV-2 were carried out in approved biosafety level 3  
96 facilities.

97 The animal studies were conducted in accordance with German laws and guidelines for animal  
98 welfare. The protocol for the rat studies received the appropriate local and national ethics  
99 committees' approvals (2347-5-2021 LAVG Brandenburg) and the protocol for the hamster  
100 studies was approved by the ethics committee of the State Office of Agriculture, Food safety,  
101 and Fishery in Mecklenburg – Western Pomerania (LALLF M-V: 7221.3-1-036/21).

### 102 **Dose response and booster studies**

103 For the dose response studies, rats (n=8/group) were anaesthetized with isoflurane and  
104 injected intramuscularly (i.m.) on Days 0 and 21 with 100 µl volume of 2, 8 or 20 µg of CV0501  
105 or BA.1 nonclinical, or 100 µl volume of 8 µg ancestral N1mΨ vaccines diluted with 0.9% NaCl.  
106 Control rats received 100 µl of 0.9% NaCl alone (n=6). On Days 14, 21 and 42 post  
107 immunization, blood was collected into Z-clot activator tubes (Sarstedt) and incubated at room  
108 temperature for 30 minutes to allow for coagulation. Tubes were then centrifuged, serum  
109 removed and stored at <-70°C. Serum samples were shipped on dry ice from Preclinics to  
110 VisMederi for analyses.

111 For the booster studies, rats were anaesthetized with isoflurane and injected i.m. on Days 0  
112 and 21 with 100 µl of 2 or 8 µg of ancestral N1mΨ or BA.1 nonclinical (n=8). Control rats  
113 received 100 µl of 0.9% NaCl alone (n=6). On Days 105 and 189 rats were given booster  
114 doses (third and fourth doses, 100 µl volume), of 2 or 8 µg of ancestral N1mΨ, CV0501 or  
115 bivalent CV0501/ancestral N1mΨ ([1 µg/1 µg] or [4 µg/4 µg]). On Days 21, 42, 77, 105, 133,  
116 161, 189 and 217 blood was collected for serum antibody analyses, as described above. For  
117 further details see [Supplementary Table 1](#).

### 118 **Neutralizing antibody titers**

119 Sera were heat inactivated at 56°C for 30 minutes. Serial dilutions of serum were incubated  
120 for 60 minutes at 37°C, with 100 TCID<sub>50</sub> (median tissue culture infectious dose) of  
121 SARS-CoV-2. The virus strains used to assess nAb titers included ancestral, Beta, Delta, BA.1  
122 (with 15 RBD mutations), BA.2 and BA.5.

123 Infectious virus was quantified by incubating 100 µl of virus-serum mixture with a confluent  
124 layer of Vero E6 cells (ATCC, Cat. 1586), followed by incubation for 3 days (with ancestral

## Assessment of Immunogenicity and Efficacy of CV0501 mRNA-based Omicron COVID-19 Vaccination in Small Animal Models

125 SARS-CoV-2) or 4 days (SARS-CoV-2 Beta, Delta, BA.1. BA.2 or BA.5) at 37°C and  
126 microscopical scoring for cytopathogenic effect (CPE). A back-titration was performed for each  
127 run to verify the range of TCID<sub>50</sub> of the working virus stock.

128 Neutralizing antibody titers were calculated according to the method described by Reed &  
129 Muench [22]. If no neutralization was observed (microneutralization test <10), an arbitrary  
130 value of 5 was attributed. Analyses were carried out by VisMederi (Siena, Italy).

### 131 **Enzyme-linked immunosorbent spot (ELISpot) assay**

132 Splenocytes from rats were isolated and single-cell suspensions were prepared in  
133 supplemented medium. A total of  $5 \times 10^5$  splenocytes per well (200 µl volume) were stimulated  
134 for 24 hours at 37°C using a SARS-CoV-2 peptide library (JPT, PM-SARS2-SMUT08-1,  
135 Germany) at 1 µg/mL. T cells were analyzed using ELISpot according to the manufacturer's  
136 protocol ELISpot Rat interferon-gamma (IFN $\gamma$ ) (Cat: EL585 by R&D Systems, United States).

### 137 **ACE2 binding inhibition assay methodology**

138 The ACE2 binding inhibition assay was based on a previously published multiplex competitive  
139 binding assay [23]. Briefly, different RBD antigens from SARS-CoV-2 variants were  
140 immobilized on spectrally distinct populations of magnetic MagPlex beads (Luminex, United  
141 States) by Anteo coupling (AMG Activation Kit for Multiplex Microspheres, Anteo  
142 Technologies, Australia [#A-LMPAKMM-400]) as previously described [23]. Coupled beads  
143 were stored at 4°C and then combined into a 25x bead mix. The antigens used in these  
144 experiments are listed in [Supplementary Table 2](#).

145 25 µL of diluted rat sera were then mixed 1:1 with 1x bead mix (25x bead mix diluted in assay  
146 buffer containing biotinylated ACE2), generating a final dilution of either 1:1600 or 1:3200, in  
147 a 96-half-well plate and incubated for 2 hours on a thermomixer (750 rpm, 20°C). Following  
148 this, samples were washed to remove unbound ACE2 using an automated magnetic plate  
149 washer. To detect bound ACE2, 2 µg/mL Streptavidin-Phycoerythrin (PE) (MOSS, Cat#  
150 SAPE-001) was added, and the plate incubated for a further 45 minutes. After washing, beads  
151 were resuspended in 100 µL of wash buffer and mixed for 3 minutes at 1000 rpm [24]. Plates  
152 were read on a FLEXMAP3D instrument (Luminex, United States) using the following settings:  
153 80 µL (no timeout), 50 events, Gate 7500-15000, Standard PMT. Each plate included 3 wells  
154 with 150 ng/mL ACE2, 2 blank wells and 3 wells with a quality control (QC) sample as controls  
155 [25]. For each variant, ACE2 inhibition was calculated as a percentage, with 100% indicating  
156 maximum ACE2 inhibition and 0% indicating no ACE2 inhibition.

## Assessment of Immunogenicity and Efficacy of CV0501 mRNA-based Omicron COVID-19 Vaccination in Small Animal Models

### 157 **Hamster challenge model**

#### 158 **Immunizations**

159 Male Syrian hamsters received 50  $\mu$ L of either 8 or 24  $\mu$ g of CV0501 or 0.9% NaCl (sham  
160 controls) (n=9/group) via i.m. injection using BD Micro-Fine 0.5 mL insulin syringes with  
161 30G  $\times$  8 mm needle, in the left outer thigh (biceps femoris) on Day 0. Second doses were  
162 administered in the right outer thigh (biceps femoris) at Day 28.

#### 163 **Challenge infection**

164 In week 8, all hamsters were challenged with  $1 \times 10^5$  TCID<sub>50</sub> SARS-CoV-2 Omicron BA.2 (B.  
165 Haagmans, Rotterdam, The Netherlands). Challenge virus was administered as 0.1 mL  
166 intranasally (i.n.) (0.05 mL in each nostril) and dose was confirmed via virus back-titration.  
167 Animals were weighed daily until sacrifice. Six animals per group were sacrificed on Day 4  
168 post-challenge for determination of viral titers in the conchae, trachea and lungs. The  
169 remaining animals (3 per group) were sacrificed on Day 14 post-challenge.

#### 170 **Viral RNA detection and quantification**

171 Approximately 0.1 cm<sup>3</sup> samples of each organ were homogenized in a 1 mL mixture composed  
172 of equal volumes of Minimum Essential Medium (MEM) Hank's balanced salts and MEM  
173 Earle's balanced salts (containing 2 mM L-glutamine, 850 mg l-1 NaHCO<sub>3</sub>, 120 mg l-1  
174 sodium pyruvate and 1% penicillin–streptomycin) at 300 Hz for 2 minutes using a TissueLyser  
175 II (Qiagen, Germany).

176 Nasal washings from hamsters (n=9/group) were obtained on Day 2 and 4 post challenge by  
177 administering 0.2 mL volume of phosphate-buffered saline directly into each nostril and  
178 subsequently collecting the efflux.

179 Nucleic acid was extracted from 100  $\mu$ L of nasal washes after a short centrifugation step or  
180 100  $\mu$ L of organ sample supernatant using the NucleoMag Vet kit (Macherey Nagel,  
181 Germany). Each extracted sample was eluted in 100  $\mu$ L. Viral RNA genome was detected and  
182 quantified by reverse transcriptase quantitative polymerase chain reaction (RT-qPCR) on a  
183 BioRad real-time CFX96 detection system (BioRad, Hercules, United States). The target  
184 sequence for amplification was the viral RNA-dependent RNA polymerase [26].

185 Genome copies of RNA per  $\mu$ L were calculated based on a quantified standard RNA, where  
186 absolute quantification was done by the QX200 Droplet Digital PCR System in combination  
187 with the 1-Step RT-ddPCR Advanced Kit for Probes (BioRad, Hercules, United States). The  
188 limit of detection was calculated to be 10 copies per reaction.



Assessment of Immunogenicity and Efficacy of CV0501 mRNA-based Omicron COVID-19  
Vaccination in Small Animal Models

189 **Surrogate ELISA**

190 This surrogate ELISA measures the percentage inhibition of BA.1 binding. Sera were  
191 screened at a 1:10 dilution using a competitive enzyme linked immunosorbent assay with the  
192 S-RBD horseradish peroxidase (HRP) for Omicron BA.1 (SARS-CoV-2 sVNT L00847-A and  
193 S-RBD HRP Z03730, GenScript, Rijswijk, The Netherlands) according to the manufacturer's  
194 instructions. A reduction in optical density (OD) of  $\geq 30\%$  compared with the mean OD of the  
195 negative control was considered positive for seroconversion of antibodies against BA.1.

196 **Neutralizing antibody titers**

197 Neutralizing antibody titers were determined at the Friedrich-Loeffler-Institut. Briefly, sera were  
198 pre-diluted  $\leq 1/64$  with Dulbecco's modified Eagle's medium (DMEM) in a 96-well deep well  
199 master plate. Subsequently, 100 TCID<sub>50</sub>/well of the respective SARS-CoV-2 (Omicron BA.1  
200 or Omicron BA.2) virus dilution was added and incubated for 1 hour at 37°C. Lastly, 100  $\mu$ L of  
201 trypsinated Vero E6 cells (cells of 1 confluent TC175 flask per 100 mL) in DMEM with 1%  
202 penicillin/streptomycin supplementation was added to each well. After 72 hours of incubation  
203 at 37°C, the cells were evaluated by light microscopy for a specific CPE. The nAb titer was  
204 the dilution with no visible CPE and the viral titers were confirmed by back-titrations.

205 **Statistical analysis**

206 Statistical analyses were performed using GraphPad Prism (version 9.0) software. Analysis  
207 of variance (ANOVA) was performed, followed by non-parametric Kruskal-Wallis post-tests or  
208 Dunnett's multiple comparison tests (vaccinated against sham) for the body weight analysis  
209 of hamsters after challenge infection. P-values were designated as: \* $p \leq 0.05$ , \*\* $p \leq 0.01$ ,  
210 \*\*\* $p \leq 0.001$  and \*\*\*\* $p \leq 0.0001$ .

211

Assessment of Immunogenicity and Efficacy of CV0501 mRNA-based Omicron COVID-19 Vaccination in Small Animal Models

212 **Results**

213 **CV0501 induces nAb responses against SARS-CoV-2 variants in Wistar rats**

214 Virus neutralizing antibodies (nAbs) against BA.1 were measured in sera from rats immunized  
215 with 2 doses of ancestral N1m $\Psi$  (8  $\mu$ g), CV0501 (2, 8 or 20  $\mu$ g) or BA.1 nonclinical (2, 8 or  
216 20  $\mu$ g) vaccines ([Figure 1](#)). Compared with NaCl-treated controls, the first dose (Day 0) of  
217 CV0501 and BA.1 nonclinical induced robust nAb responses against the BA.1 variant  
218 (measured on Days 14 and 21), with titers increasing between 8 and 19-fold between Day 21  
219 and Day 42. Compared with the 8  $\mu$ g ancestral N1m $\Psi$  vaccine, BA.1 nonclinical (8 and 20  $\mu$ g)  
220 induced significantly higher BA.1-specific nAb titers at all timepoints. Similar differences were  
221 observed for CV0501. No significant differences were detectable between CV0501 and BA.1  
222 nonclinical at any time point.

223 At Day 14 and 21, following a single dose of CV0501 (8  $\mu$ g), 12-fold and 3.4-fold higher nAb  
224 titers against BA.1, respectively, were noted compared with serum from rats receiving a single  
225 dose of 8  $\mu$ g ancestral N1m $\Psi$  vaccine. At Day 42, serum from rats following the second  
226 immunization of CV0501 (8  $\mu$ g) had 2.3-fold higher nAb titers against BA.1 compared with rats  
227 receiving a second immunization of 8  $\mu$ g ancestral N1m $\Psi$  vaccine ([Figure 1](#)).

228 Next, the induction of cross-nAbs following two immunizations of ancestral N1m $\Psi$  vaccine,  
229 CV0501 or BA.1 nonclinical were compared on Day 42 ([Figure 2](#)). Analysis of rats vaccinated  
230 with CV0501 and BA.1 nonclinical demonstrated a dose-dependent increase in cross-nAbs  
231 between 2  $\mu$ g and 8  $\mu$ g groups across all tested SARS-CoV-2 variants. Induction of cross-  
232 nAbs was comparable for the 8  $\mu$ g and 20  $\mu$ g groups of CV0501 against all variants, likely due  
233 to a saturation effect at high doses. CV0501 and BA.1 nonclinical induced overall comparable  
234 nAb titers against ancestral, Beta, Delta, BA.2 and BA.5 variants. However, a trend towards  
235 increased nAb titers following vaccination with CV0501 compared with BA.1 nonclinical was  
236 observed for all variants, and this was statistically significant for BA.2 neutralization in the 8 $\mu$ g  
237 groups ([Figure 2d](#)). An exception to this was Beta SARS-CoV-2 neutralization, whereby  
238 immunization with BA.1 nonclinical elicited numerical higher nAb titres compared with CV0501  
239 ([Figure 2b](#)).

240 Immunization with 8  $\mu$ g ancestral N1m $\Psi$  yielded significantly higher levels of cross-nAbs  
241 against ancestral, Delta and BA.5 SARS-CoV-2 compared with 8  $\mu$ g BA.1 nonclinical ([Figure](#)  
242 [2a,c,e](#)). No significant differences in cross-neutralisation of Beta or BA.2 were detectable  
243 between ancestral N1m $\Psi$  and BA.1 nonclinical in 8  $\mu$ g groups ([Figure 2b,d](#)). Furthermore, no  
244 significant differences in cross-neutralization of all SARS-CoV-2 variants were detectable  
245 between ancestral N1m $\Psi$  and CV0501 in the 8  $\mu$ g groups, except for Beta neutralization which  
246 was significantly increased upon vaccination with ancestral N1m $\Psi$  ([Figure 2b](#)). In a side-by-

Assessment of Immunogenicity and Efficacy of CV0501 mRNA-based Omicron COVID-19 Vaccination in Small Animal Models

247 side comparison of different SARS-CoV-2 variants, two doses of CV0501 (2, 8 or 20 µg)  
248 induced highest nAb titers against Omicron BA.1, BA.2 and BA.5 compared with ancestral,  
249 Beta and Delta neutralization in rats ([Figure S1](#)).

250 Spike-specific IFN- $\gamma$ -producing T cells stimulated with an Omicron peptide pool were analysed  
251 from rat splenocytes isolated on Day 42 via ELISpot ([Figure S2](#)). Comparison of the 8 µg  
252 doses of each vaccine showed that CV0501 induced significantly higher numbers of IFN- $\gamma$   
253 spots compared with the ancestral N1m $\Psi$  vaccine, while no significant differences were  
254 observed between ancestral N1m $\Psi$  and BA.1 nonclinical or CV0501 and BA.1 nonclinical at  
255 8 µg.

Assessment of Immunogenicity and Efficacy of CV0501 mRNA-based Omicron COVID-19 Vaccination in Small Animal Models

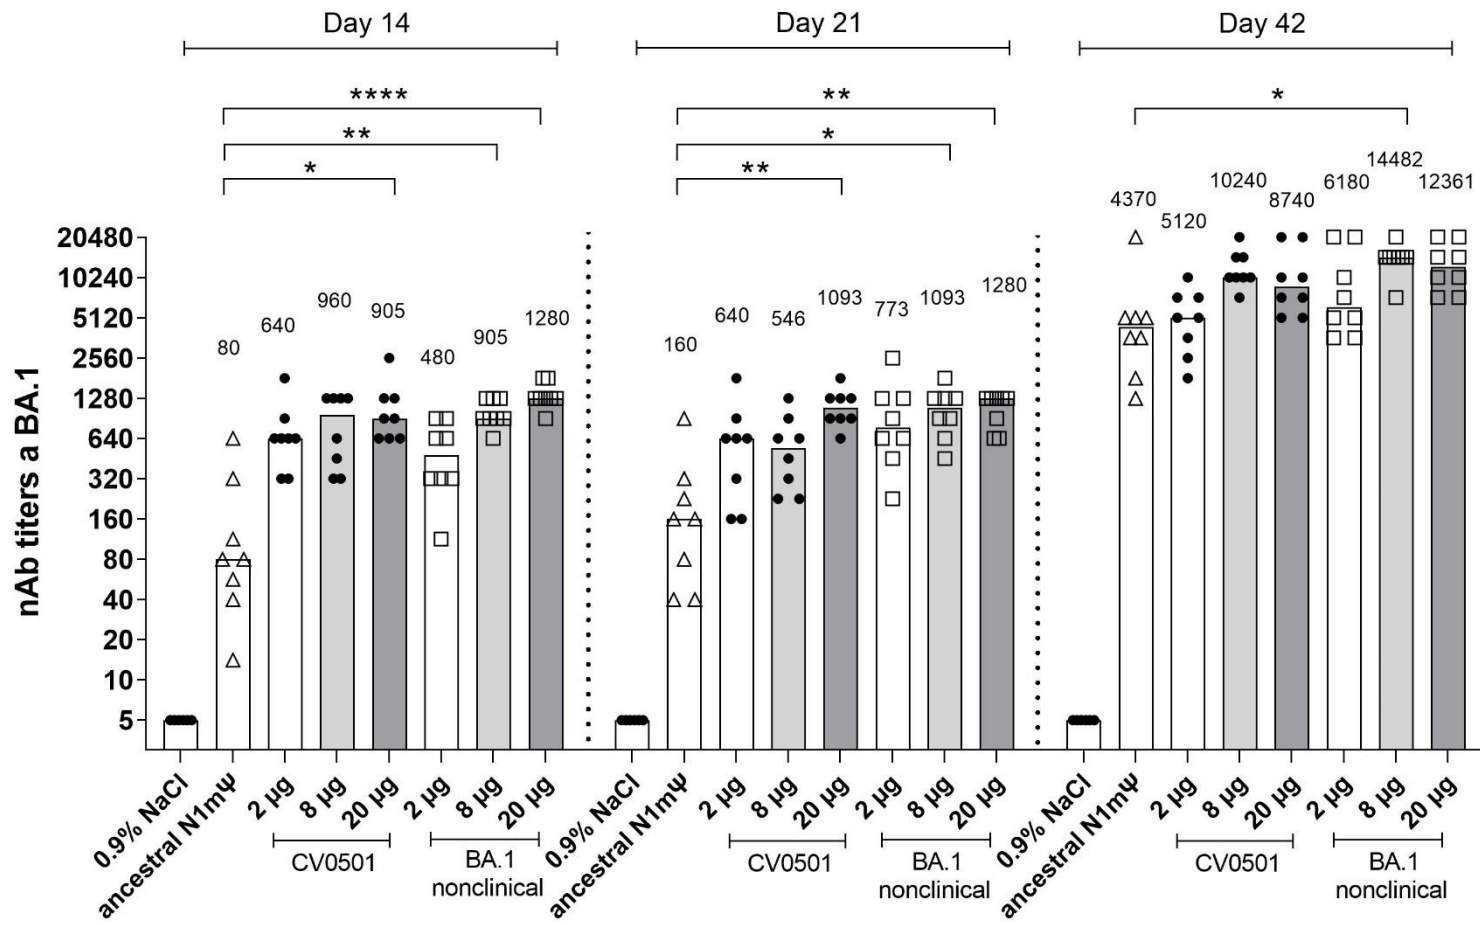

Assessment of Immunogenicity and Efficacy of CV0501 mRNA-based Omicron COVID-19 Vaccination in Small Animal Models

**Figure 1: CV0501 and BA.1 nonclinical induce BA.1 specific viral nAb titers upon vaccination over time.**

Wistar rats (n=8/group) were immunized i.m. on Days 0 and 21 with different doses of CV0501 or comparator vaccine (ancestral N1m $\Psi$  [8  $\mu$ g] or BA.1 nonclinical). nAb titers from rat serum were measured on 14-, 21- and 42-days post-immunization. Sera were analyzed after each timepoint and data combined into a single figure. Each symbol represents an individual animal and bars depict the median (values are indicated as number above each bar). Statistical analysis was performed on each timepoint separately. ANOVA and Kruskal-Wallis tests were used to compare all groups to ancestral N1m $\Psi$  and to 8  $\mu$ g CV0501, respectively. Only statistically significant results are indicated. \*p < 0.05, \*\*p < 0.01, \*\*\*\*p < 0.0001.

Assessment of Immunogenicity and Efficacy of CV0501 mRNA-based Omicron COVID-19 Vaccination in Small Animal Models

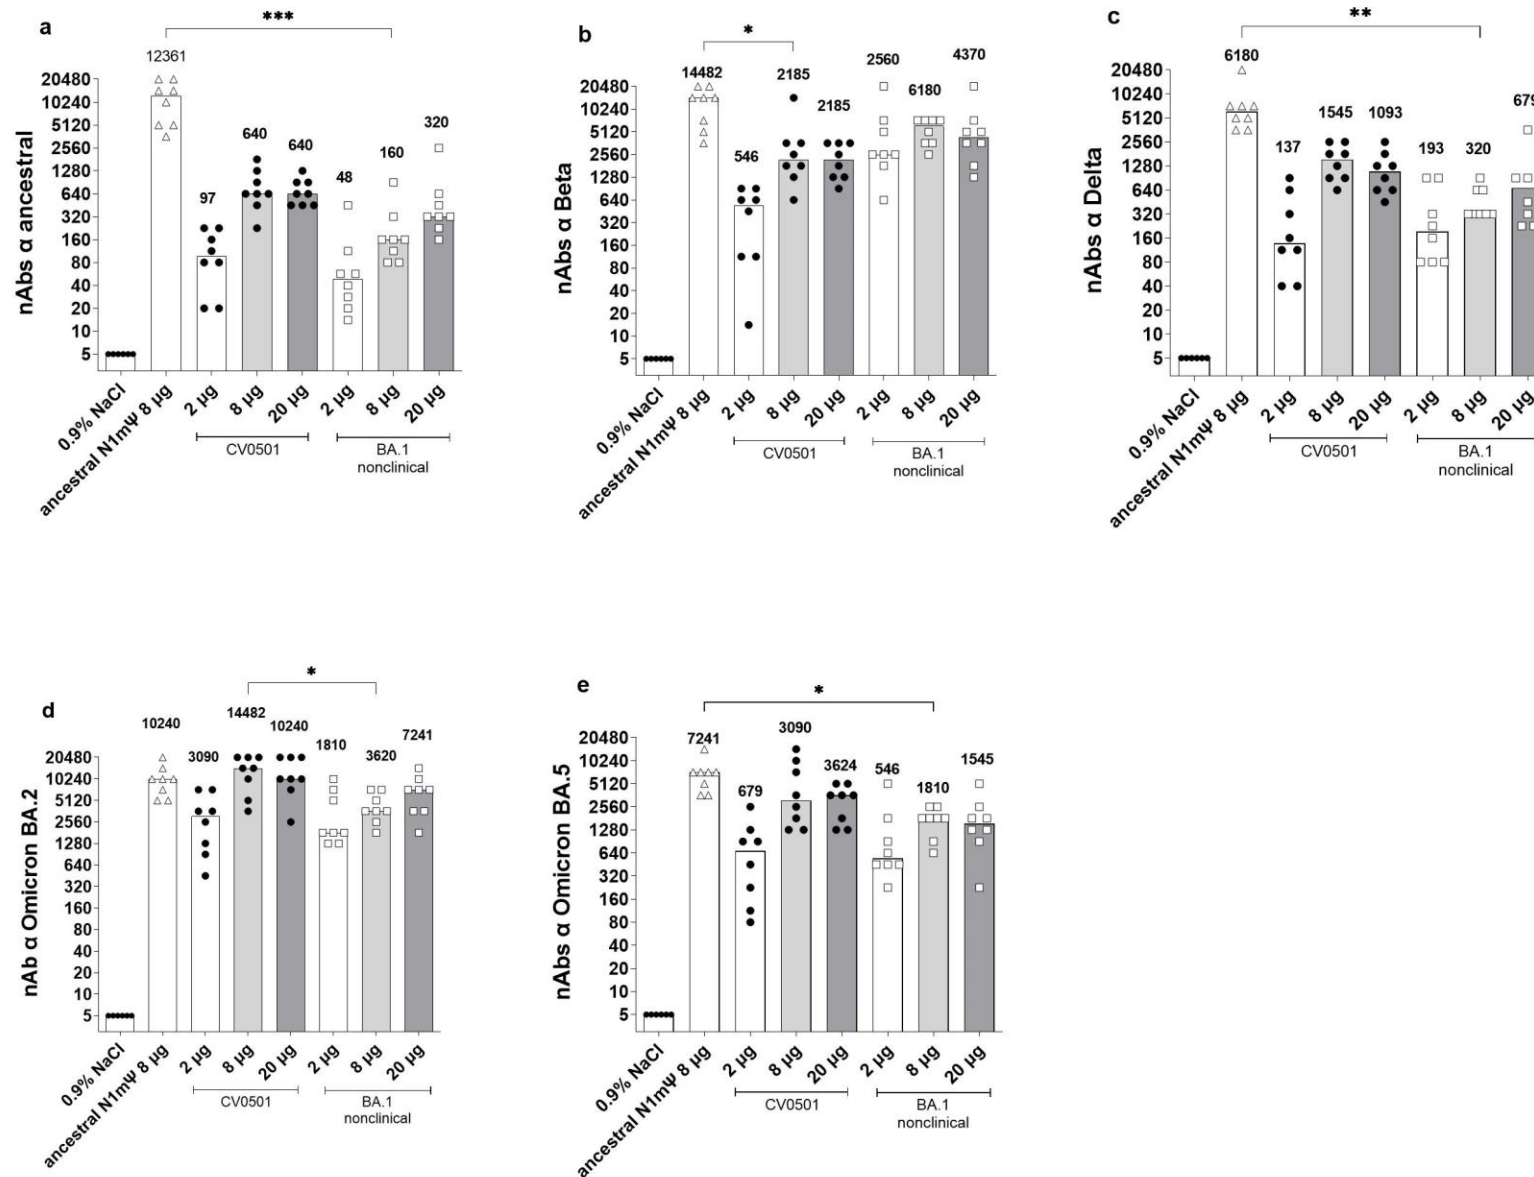

Assessment of Immunogenicity and Efficacy of CV0501 mRNA-based Omicron COVID-19 Vaccination in Small Animal Models

**Figure 2: CV0501 and BA.1 nonclinical preferentially induce cross nAbs towards the Omicron subvariants**

Wistar rats (n=8/group) were immunized on Days 0 and 21 with 2, 8 or 20 µg CV0501 or BA.1 nonclinical, 8 µg of ancestral N1mΨ, or 0.9% NaCl (control, n=6). nAbs against the ancestral (a), Beta (b), Delta (c), BA.2 (d) and BA.5 (e) SARS-CoV-2 variants were assessed from serum taken on Day 42 post immunization. The symbols represent individual animals and the bars the median (median values are indicated as number above each bar). Statistical analyses were performed via pair-wise comparisons between ancestral N1mΨ, 8µg CV0501 and 8µg BA.1 nonclinical using ANOVA and Kruskal-Wallis test. Only significant results are indicated. \*p < 0.05, \*\*p < 0.01, \*\*\*p < 0.001.

Assessment of Immunogenicity and Efficacy of CV0501 mRNA-based Omicron COVID-19 Vaccination in Small Animal Models

255 **CV0501 boosting induces cross-nAbs against SARS-CoV-2 variants in**  
256 **ancestral- primed Wistar rats**

257 Viral nAb titers against SARS-CoV-2 BA.1 were assessed in rats primed with 2 doses of  
258 ancestral N1m $\Psi$  or BA.1 nonclinical (2  $\mu$ g or 8  $\mu$ g; Days 0 and 21) and boosted with 2  $\mu$ g or  
259 8  $\mu$ g of either CV0501, ancestral N1m $\Psi$  or a bivalent combination of ancestral N1m $\Psi$  and  
260 CV0501 (CV0501/ancestral N1m $\Psi$ ) on Day 105 and Day 189 (Figure 3, Figure S3, Table 2).

261 The lowest nAb levels against BA.1 were observed in ancestral N1m $\Psi$ -primed/ancestral  
262 N1m $\Psi$  boosted animals and the highest nAb levels against BA.1 were observed in BA.1  
263 nonclinical primed/CV0501 boosted animals (Table 2, Figure 3 c, d).

264 BA.1-specific nAb titers increased between Day 21 and Day 42, following the second priming  
265 dose in all groups. In general, titers induced by priming were numerical higher in the 8  $\mu$ g  
266 groups compared with the 2  $\mu$ g groups. The highest nAb titers against BA.1 upon priming were  
267 observed in the serum of BA.1 nonclinical-primed rats (Figure 3d, Table 2). Following a third  
268 vaccine dose (first boost) on Day 105, increases in nAb titers against BA.1 were observed for  
269 all vaccine combinations (Day 105 vs. Day 133), although the effect was more pronounced in  
270 the 2- $\mu$ g ancestral N1m $\Psi$ -primed groups (Fig. 3a and 3b). The highest fold increase in nAbs  
271 between Day 105 and Day 133 in the 2  $\mu$ g groups primed with ancestral N1m $\Psi$  was observed  
272 upon CV0501 boosting (5.6-fold) (Fig. 3a), followed by bivalent CV0501/ancestral N1m $\Psi$   
273 boosting (1.9-fold) (Fig. 3b) and ancestral N1m $\Psi$  boosting (1.5-fold) (Fig. 3c). Priming and  
274 boosting with BA.1 encoding vaccines induced the lowest increase of 1.2 fold between Day  
275 105 and Day 133 (Table 2) (Fig. 3d). The differences were less pronounced in the 8  $\mu$ g dose  
276 groups although the BA.1 nonclinical-primed/CV0501 boost group showed a 2.3-fold increase  
277 in nAbs between Day 105 and Day 133 (Table 2). In all 2  $\mu$ g and 8  $\mu$ g vaccine dose groups,  
278 the second booster dose (Day 189) increased BA.1-specific nAb titers (Day 189 vs. Day 217)  
279 although none of the increases were statistically significant (Figure 3). The fold increase in  
280 neutralizing titers after second boost (Day 189) followed the trend of the first boost (Day 105)  
281 (Table 2).

282 On Day 217 (28 days after the fourth vaccine/second booster dose) the neutralizing activity of  
283 rat serum was compared against the ancestral, Delta and Omicron BA.1, BA.2 and BA.5  
284 SARS-CoV-2 variants (Figure 4). All vaccine combinations induced high levels of nAbs against  
285 all of the SARS-CoV-2 variants tested, with each 8  $\mu$ g vaccine regimen outperforming its  
286 equivalent 2  $\mu$ g counterpart in all cases (Table 3).

287 All regimens (2  $\mu$ g and 8  $\mu$ g) featuring ancestral N1m $\Psi$  priming induced higher nAb titers  
288 against the ancestral and Delta variants than the regimen combining BA.1-based priming and  
289 boosting (Figure 4a,b, Table 3) with statistically significant differences observed for



Assessment of Immunogenicity and Efficacy of CV0501 mRNA-based Omicron COVID-19 Vaccination in Small Animal Models

290 CV0501/ancestral N1m $\Psi$  and ancestral N1m $\Psi$  (2 and 8  $\mu$ g doses) but not the 8  $\mu$ g dose for  
291 ancestral N1m $\Psi$  against Delta. On the other hand, the regimen employing only BA.1 based  
292 vaccines produced numerical higher nAb titers against the BA.1 and BA.2 variants than the  
293 regimens based on ancestral N1m $\Psi$  priming (Figure 4c, d, Table 3). Similar levels of nAbs  
294 against BA.5 were induced in all the 2  $\mu$ g groups. All 8  $\mu$ g groups, primed with ancestral  
295 N1m $\Psi$ , followed by booster vaccination with CV0501 as a monovalent or bivalent had  
296 significantly increased BA.5 nAb titers compared with ancestral N1m $\Psi$  boosting (Figure 4e).

297 Boosting with bivalent CV0501/ancestral N1m $\Psi$  and monovalent CV0501 induced nAb titers  
298 against all variants tested. There was a trend towards increased responses against ancestral,  
299 Delta, BA.2 and BA.5 in the 2  $\mu$ g groups of animals boosted with bivalent CV0501/ancestral  
300 N1m $\Psi$  compared with monovalent CV0501 vaccine that was non-significant for all variants  
301 except for ancestral (Figure 4 a, b, d, e).

302 Priming with ancestral N1m $\Psi$  resulted in broader ACE2 binding inhibition against RBDs of a  
303 range of SARS-CoV-2 variants, compared with priming with BA.1 nonclinical (Figure 5).  
304 Among the 2  $\mu$ g vaccine regimens, priming with ancestral N1m $\Psi$  and boosting with the  
305 bivalent CV0501/ancestral N1m $\Psi$  vaccine tended to increase ACE2 binding inhibition across  
306 the SARS-CoV-2 variants tested compared with all the other combinations assessed (Figure  
307 5a). However, this trend was absent in the 8  $\mu$ g dose groups, where the inhibition capacity for  
308 all the ancestral N1m $\Psi$ -primed regimens was comparable (Figure 5b).

Assessment of Immunogenicity and Efficacy of CV0501 mRNA-based Omicron COVID-19 Vaccination in Small Animal Models

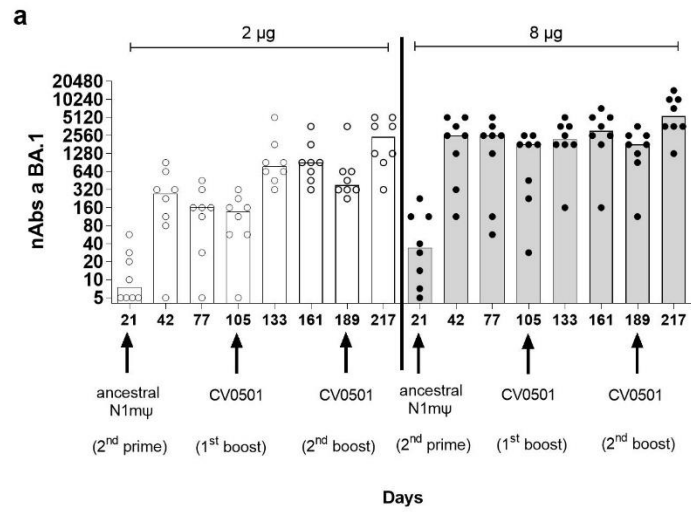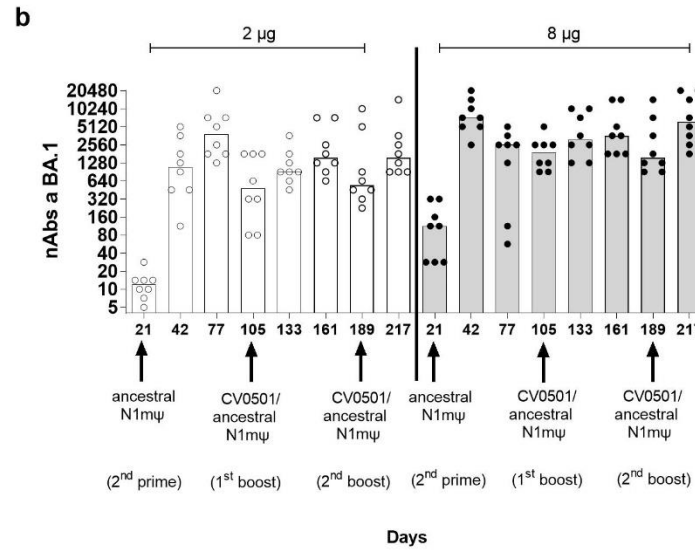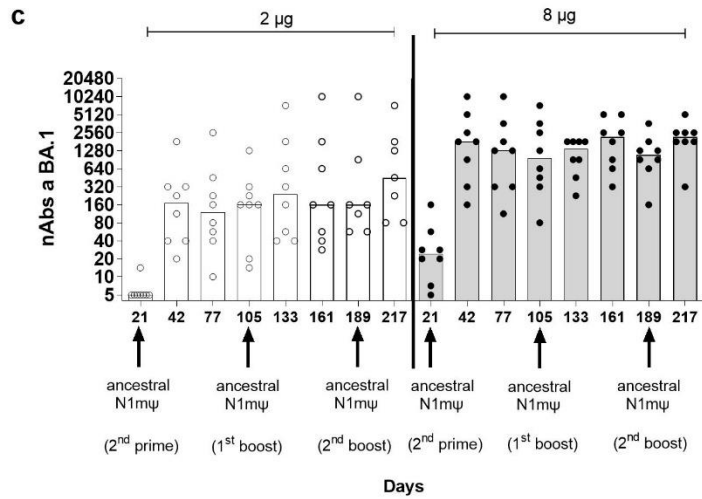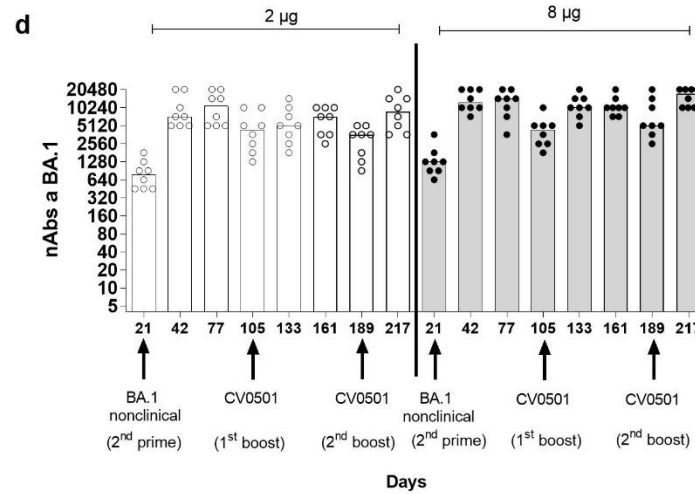

Assessment of Immunogenicity and Efficacy of CV0501 mRNA-based Omicron COVID-19 Vaccination in Small Animal Models

**Figure 3: CV0501 and bivalent CV0501/ancestral N1mΨ boost nAb titers against BA.1 after priming with ancestral N1mΨ vaccine.**

Wistar rats (n=8/group) were immunized i.m. (1<sup>st</sup> and 2<sup>nd</sup> prime) on Days 0 and 21 with either 2 μg (clear circles, white bars) or 8 μg (black circles, grey bars) doses of ancestral N1mΨ or BA.1 nonclinical. On Days 105 and 189, rats were given a third and fourth dose (1<sup>st</sup> and 2<sup>nd</sup> boost) of either **(a, d)** CV0501, **(b)** bivalent CV0501/ancestral N1mΨ (half doses of each), **(c)** ancestral N1mΨ (2 μg or 8 μg doses). nAbs against BA.1 SARS-CoV-2 were assessed in sera obtained on Days 21, 42, 77, 105, 133, 161, 189 and 217. Each symbol represents an individual rat and the bars represent the median value. Analyses of nAb titers were performed on separate days for each timepoint. One-way ANOVAs and Kruskal-Wallis tests were performed to compare nAb titers between Days 105 and 133 and between Days 189 and 217.

Assessment of Immunogenicity and Efficacy of CV0501 mRNA-based Omicron COVID-19 Vaccination in Small Animal Models

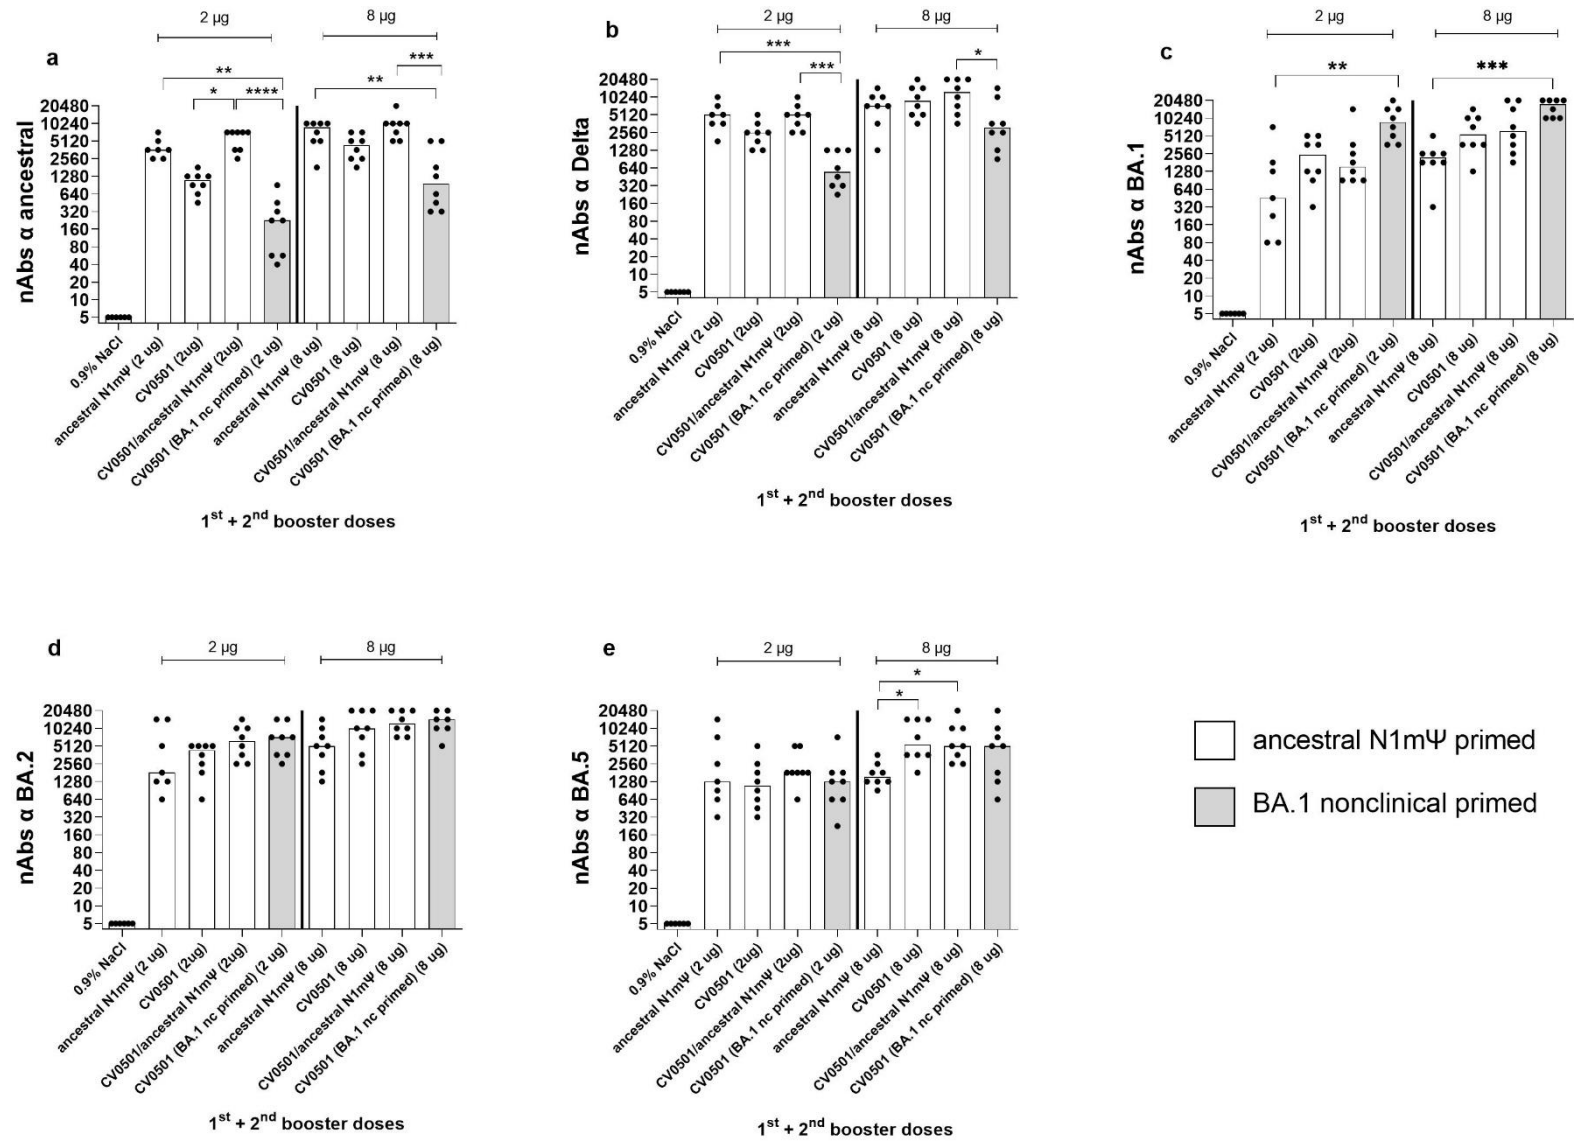

Assessment of Immunogenicity and Efficacy of CV0501 mRNA-based Omicron COVID-19 Vaccination in Small Animal Models

**Figure 4: CV0501, ancestral N1m $\Psi$  and bivalent CV0501/ancestral N1m $\Psi$  boost cross-nAb titers after priming with ancestral N1m $\Psi$  vaccine**

Wistar rats (n=8/group) were immunized i.m. on Days 0 and 21 with 2  $\mu$ g or 8  $\mu$ g of ancestral N1m $\Psi$  (white bars) or BA.1 nonclinical (grey bars) and boosted on Days 105 and 189 with either CV0501, the bivalent combination CV0501/ancestral N1m $\Psi$  or ancestral N1m $\Psi$ . Animals immunized with 0.9% NaCl Buffer (n=6/group) were used as negative controls. Neutralizing Abs against ancestral (**a**), Delta (**b**), BA.1 (**c**), BA.2 (**d**) or and BA.5 (**e**) SARS-CoV-2 variants were assessed in sera taken on Day 217. Each dot represents an individual animal, bars represents the median (median values are indicated as number above each bar). One-way ANOVAs and Kruskal-Wallis tests for the 2 $\mu$ g and 8 $\mu$ g doses were performed. \*p < 0.05, \*\*p < 0.01, \*\*\*p < 0.001, \*\*\*\*p < 0.0001.

Assessment of Immunogenicity and Efficacy of CV0501 mRNA-based Omicron COVID-19 Vaccination in Small Animal Models

a

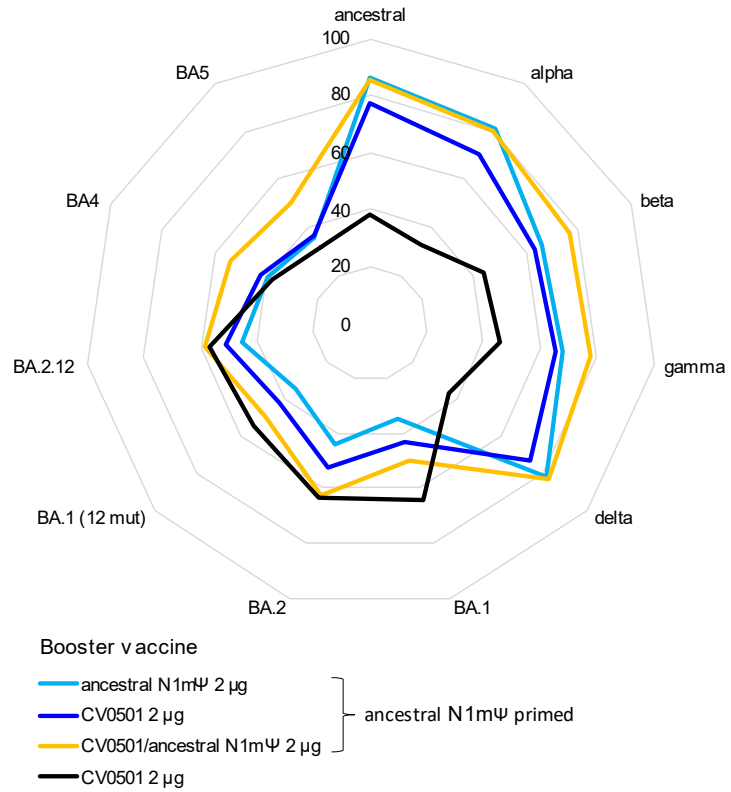

b

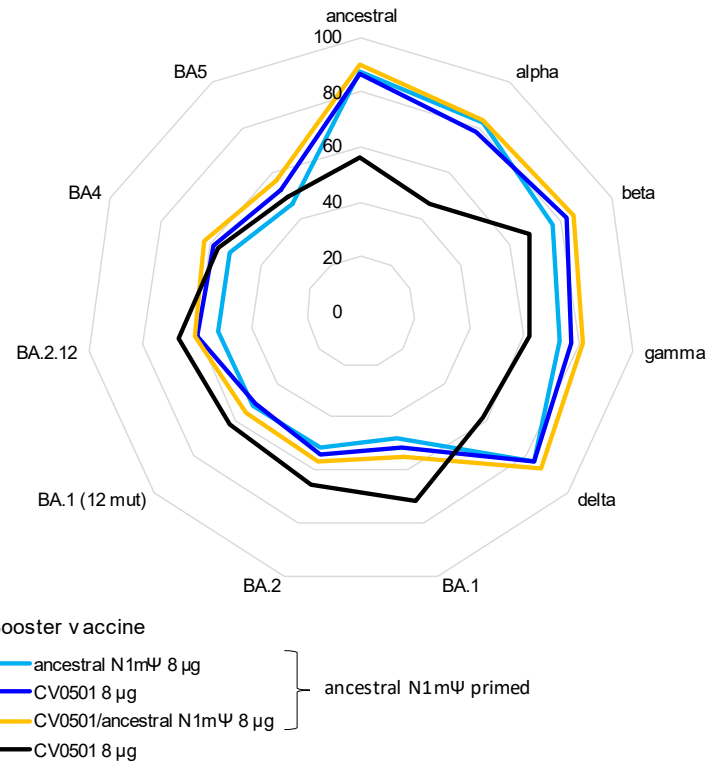

Assessment of Immunogenicity and Efficacy of CV0501 mRNA-based Omicron COVID-19 Vaccination in Small Animal Models

**Figure 5: Priming of rats with ancestral N1m $\Psi$  results in induction of broader ACE2-binding inhibiting antibodies compared to priming with BA.1 nonclinical with little variance induced by selection of booster vaccine**

Wistar rats (n=8/group) were immunized on Days 0 and 21 with 2 or 8  $\mu$ g of ancestral N1m $\Psi$  or BA.1 nonclinical (black line) and boosted on Day 105 with either CV0501 alone (dark blue line and black line), ancestral N1m $\Psi$  alone (light blue line) or the bivalent combination CV0501/ancestral N1m $\Psi$  (orange line). Sera collected on Day 133 from rats receiving 2  $\mu$ g vaccines was diluted 1:1600 (**a**) and from rats receiving 8  $\mu$ g vaccines was diluted 1:3200 (**b**) for the ACE2 binding inhibition assay. Data are displayed as the percentage RBD-binding inhibition, with 0% being in the inner circle and 100% in the outmost circle

Assessment of Immunogenicity and Efficacy of CV0501 mRNA-based Omicron COVID-19 Vaccination in Small Animal Models

307 **CV0501 protects against weight loss and viral replication in the respiratory**  
308 **tract in Syrian hamsters**

309 To gain insights into the protective efficacy of CV0501, Syrian hamsters vaccinated twice with  
310 8 µg or 24 µg of CV0501 were challenged with  $10^5$  TCID<sub>50</sub> of Omicron BA.2 four weeks post  
311 second vaccination. A buffer vaccinated group challenged in parallel served as sham-control.

312 Animals were weighed daily during the challenge phase from Days 56 to 70 (Days 0 to 14  
313 post-challenge: [Figure 6a](#)). The animals in the sham-immunized group had the highest mean  
314 weight loss (6.5%) up to Day 6 post-challenge with weights returning to the baseline level  
315 within 8 days, in line with the non-lethal challenge model. At Day 4, animals in the 24 µg  
316 CV0501-immunized group had significantly higher relative body weight compared with the  
317 sham-immunized. Apart from this, there was no significant difference between the groups  
318 throughout the challenge phase.

319 Viral replication in the upper respiratory tract was evaluated in nasal washes performed on  
320 Day 2 and Day 4 post challenge and analysed via RT-qPCR. For all groups, the BA.2 viral  
321 genome load in nasal washes was lower on Day 4 compared with Day 2 ([Figure 6b](#)). Levels  
322 of viral genomes were readily detectable in all groups. However, vaccination with CV0501  
323 induced a dose-dependent reduction of viral genome copies in the immunized hamsters.  
324 Detected reductions were 2 and 9-fold (Day 2) and 4 and 67-fold (Day 4) for the 8µg and 24µg  
325 CV0501 vaccinated groups, respectively. Statistically significant lower levels of BA.2 viral  
326 genome copies were detected at Day 2 and Day 4 in the nasal washes from animals  
327 immunized with 24 µg CV0501, compared to sham immunized controls.

328 Viral loads were assessed in nasal conchae, trachea and lung samples collected on Day 4  
329 (n=6/group) and Day 14 (n=3/group) post BA.2 challenge ([Figure 6c](#) and [Figure 6d](#)). Overall  
330 viral genome copies were higher on Day 4 compared with Day 14 tissue samples. In parallel  
331 to results in nasal washes, immunization with both 8 µg and 24 µg of CV0501 significantly  
332 reduced genome copies in the conchae at both timepoints, compared with sham-vaccinated  
333 animals. CV0501 vaccination reduced viral genome copies in the conchae 8- and 45-fold (Day  
334 4) and 4- and 17-fold (Day 14) in 8 µg and 24 µg CV0501 vaccinated groups, respectively. At  
335 Day 4 post challenge, lower numbers of viral genome copies were observed in the lungs of  
336 both CV0501-immunized groups, compared with sham-immunized group ([Figure 6C](#)).  
337 Immunization with 8µg of CV0501 reduced viral genome copies by 3Log<sub>10</sub> (cranial), 2.5 Log<sub>10</sub>  
338 (medial) and 3.3 Log<sub>10</sub> (caudal), compared with sham-immunized hamsters. Immunization with  
339 24 µg of CV0501 elicited reductions of 2.7 Log<sub>10</sub> (cranial), 3.1 Log<sub>10</sub> (medial) and 3.8 Log<sub>10</sub>  
340 (caudal), compared with sham controls. On Day 14 post-challenge, BA.2 genome copies were  
341 undetectable in the trachea and lungs of any CV0501-immunized animals, although none of



## Assessment of Immunogenicity and Efficacy of CV0501 mRNA-based Omicron COVID-19 Vaccination in Small Animal Models

342 the comparisons with sham vaccinated animals were statistically significant in the lower  
343 respiratory tract (Figure 6d). CV0501 immunization resulted in a reduction of viral genome  
344 copies in the lower respiratory tract, although the reductions observed in the conchae were  
345 statistically lower than in the sham vaccinated animals.

346 The neutralizing ability of sera from CV0501-immunized hamsters against BA.1 (Figure 7a)  
347 and BA.2 (Figure 7b) variants was assessed immediately before SARS-CoV-2 challenge (Day  
348 0) and on Days 4 and 14 post-challenge. Prior to challenge (Day 0), CV0501 immunization  
349 induced robust dose-dependent nAb titers against BA.1 (Figure 7a) and to a lesser extent  
350 against BA.2 (Figure 7b). While no increase in nAbs against either subvariant tested was  
351 detected upon challenge in the sham group, BA.2 challenge infection led to an overall increase  
352 of nAbs titers against BA.1 and BA.2 in CV0501 vaccinated animals over time. Despite nAb  
353 titers against BA.2 being lower on Days 0 and 4 compared with BA.1, the nAb titers against  
354 both BA.1 and BA.2 reached similar levels by Day 14. The increase in nAbs was most  
355 pronounced in the 8- $\mu$ g dose group and significant on Day 14 for both BA.1 and BA.2  
356 neutralization compared with sham vaccinated (Figure 7 a, b). Due to the low volume of sera  
357 available for viral neutralization assays, the starting dilution used for the nAb assay was 1:64.  
358 To provide more sensitive nAb data, a surrogate competition ELISA was performed. This  
359 ELISA measures the percentage inhibition of BA.1 binding with a cut-off value of 30% being  
360 considered as sero-positive (Figure S4). Results showed a similar inhibition after immunization  
361 with both 8  $\mu$ g and 24  $\mu$ g doses of CV0501, at all timepoints. On Day 0 and 4 post challenge,  
362 sham-immunized hamsters demonstrated lower inhibition compared with CV0501. The  
363 percentage of inhibition increased in sham-immunized hamsters on Day 14 post challenge,  
364 which was not observed in the less sensitive neutralization assay (Figure 7 a,b).

365

Assessment of Immunogenicity and Efficacy of CV0501 mRNA-based Omicron COVID-19 Vaccination in Small Animal Models

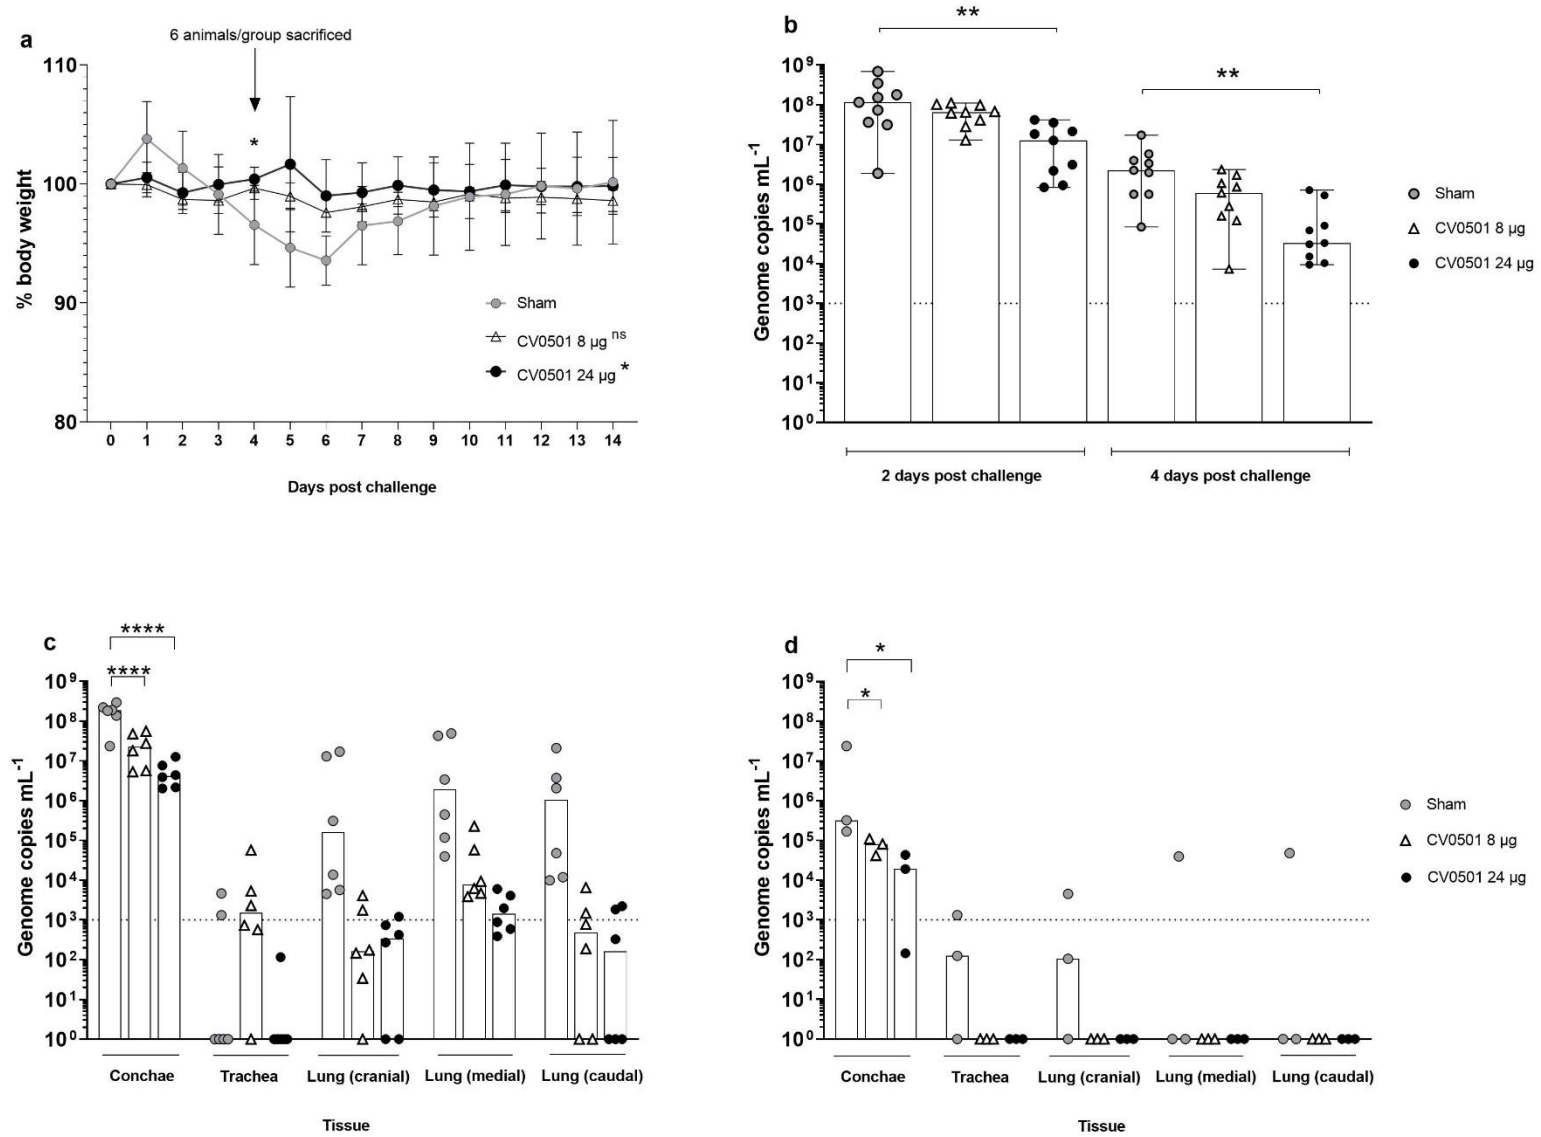

Assessment of Immunogenicity and Efficacy of CV0501 mRNA-based Omicron COVID-19 Vaccination in Small Animal Models

**Figure 6: Immunization with CV0501 provided protection against Omicron BA.2 challenge in Syrian hamsters**

Male Syrian hamsters (n=9/group) received either 8 µg or 24 µg CV0501 or 0.9% NaCl (sham controls) on Days 0 and 28, followed by challenge with Omicron BA.2 ( $10^5$  TCID<sub>50</sub>/animal administered i.n. at 0.05 mL per nostril) on Day 56. **(a)** Percentage body weight was recorded daily between Days 0 and 14 post-challenge. Each dot represents the mean value of the group at the indicated time points. Error bars show the SD in each group. Statistical analyses were performed using Dunnett's Test for multiple comparisons. **(b)** Viral replication in the nose was assessed in nasal wash samples collected on Days 2 and 4 post-challenge by RT-qPCR. Each dot represents an individual animal, bars represent the median value of the group at the various time points. Statistical analyses were performed for Days 2 and 4 days post-challenge separately using Kruskal-Wallis test and Dunnett's Test for multiple comparisons. The dashed line indicates the lower limit of detection for the assay. **(c,d)** Viral loads were assessed in conchae, trachea and lung (cranial, caudal and medial) samples collected on Day 4 **(c)** or on Day 14 **(d)** post-challenge. Each dot represents an individual animal, bars depict the median value of the group at the various time points. Statistical analysis was performed using two-way ANOVA testing. Samples exhibiting less than  $10^3$  genome copies per mL (dashed line) were considered negative. \*p < 0.05, \*\*p < 0.01, \*\*\*\*p < 0.0001

Assessment of Immunogenicity and Efficacy of CV0501 mRNA-based Omicron COVID-19 Vaccination in Small Animal Models

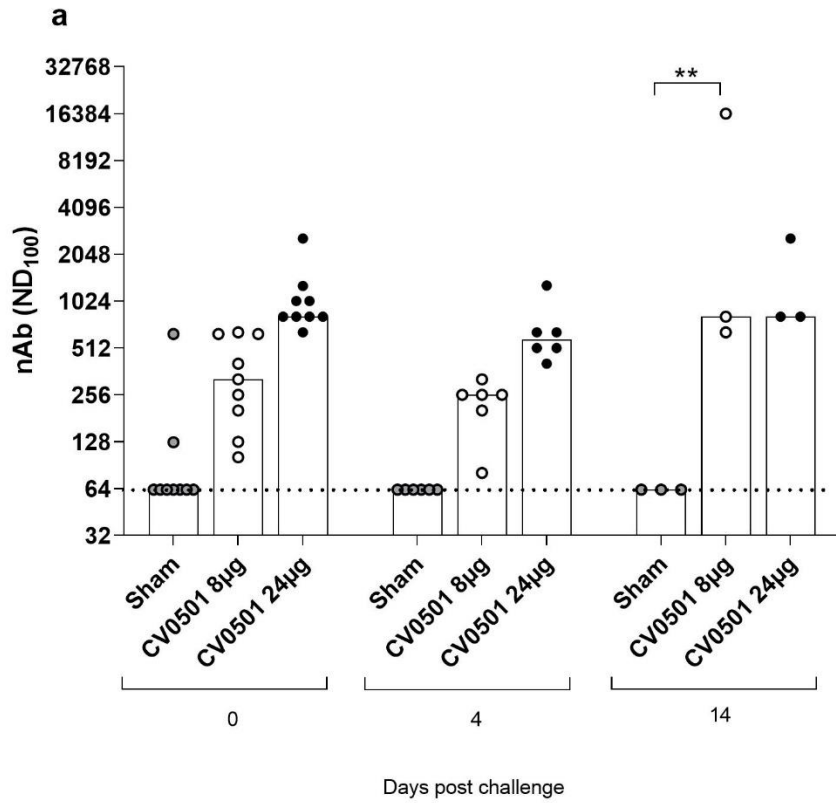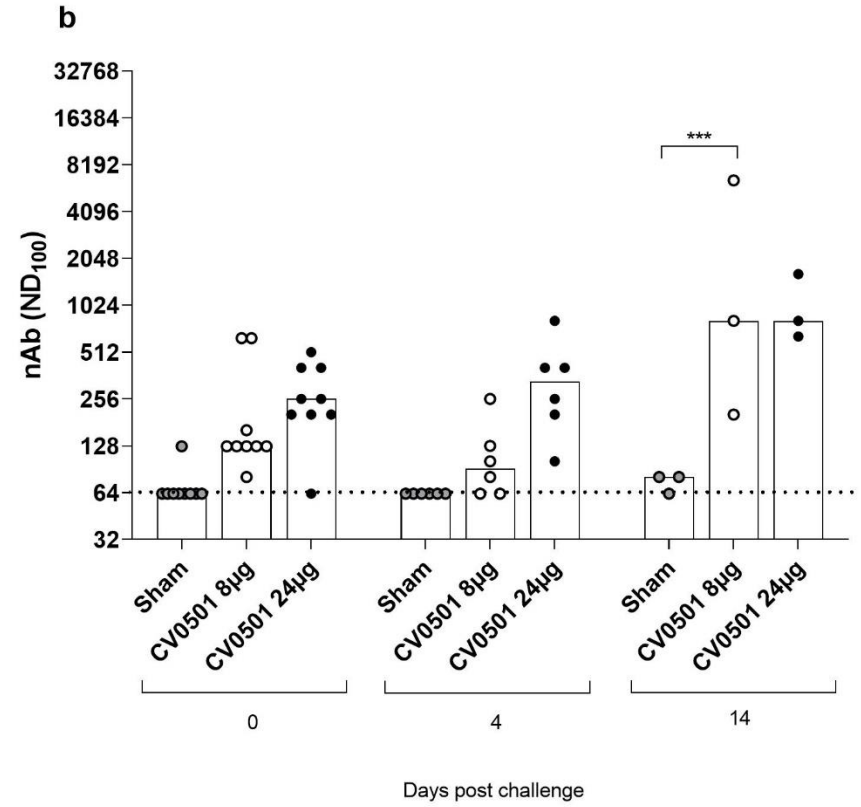

Assessment of Immunogenicity and Efficacy of CV0501 mRNA-based Omicron COVID-19 Vaccination in Small Animal Models

**Figure 7: Significant induction of nAb against BA.1 and BA.2 Omicron variants observed after CV0501 vaccination.**

Hamsters (n=9/group) were immunized on Days 0 and 28 with 8 µg or 24 µg doses of CV0501 or 0.9% NaCl (sham controls) and challenged on Day 56 with Omicron BA.2 ( $10^5$  TCID<sub>50</sub>/animal administered i.n. at 0.05 mL per nostril). nAbs against BA.1 (**a**) and BA.2 (**b**) were assessed in sera collected on Days 0 and 4 (6 animals/groups) or Day 14 (3 animals/groups) post-challenge. Virus nAb titers expressed as the neutralizing dose (ND) 100 of the sera. Each dot represents an individual animal, and the bars represent the median value of the group at the various time points. The horizontal dotted lines indicate the lower limit of detection of the assay. Statistical analysis was performed using two-way-ANOVA and Dunnett's Test for multiple comparison. \*\*p < 0.01, \*\*\*p < 0.001

Assessment of Immunogenicity and Efficacy of CV0501 mRNA-based Omicron COVID-19 Vaccination in Small Animal Models

363 **Discussion**

364 Despite the success of global COVID-19 immunization programs resulting in protection  
365 against severe COVID-19, widely employed vaccines based on the ancestral S protein provide  
366 only short-lived protection against mild-to-moderate disease and have low vaccine  
367 effectiveness against symptomatic disease with Omicron [27,28]. The objective of this study  
368 was to assess the immunogenicity and efficacy of vaccine candidate, CV0501, which encodes  
369 the S protein of the Omicron variant BA.1, as both a monovalent or bivalent vaccine in  
370 combination with S protein of ancestral SARS-CoV-2.

371 In Wistar rats, CV0501 induced robust, dose-dependent levels of nAbs against homologous  
372 SARS-CoV-2 BA.1 upon a single injection and was able to elicit nAb responses against the  
373 tested SARS-CoV-2 variants, including Omicron subvariants BA.2 and BA.5, thus showing  
374 promise for inducing protection against future Omicron-derived subvariants. In this study, two  
375 versions of the BA.1 vaccine, CV0501 and BA.1 nonclinical candidate, were tested. The latter  
376 contains three mutations in the receptor-binding domain (RBD), i.e., K417N, N440K and  
377 G446S that are not present in the S protein encoded by CV0501. These mutations which were  
378 observed in the original BA.1 variant are present in only 60-65% of BA.1 isolates. All three  
379 mutations have been reported to be involved in immune evasion from a subset of neutralizing  
380 monoclonal antibodies [29-31]. However, we observed no significant differences in nAb  
381 responses induced by CV0501 and BA.1 nonclinical candidate, which also held true for nAb  
382 titers against BA.2 and BA.5 that have the K417N and N440K mutations. Overall, no  
383 differences indicative of significant changes in vaccine immunogenicity were detected  
384 between the two tested BA.1 vaccines in our experimental system. The sequence of CV0501  
385 was favoured since it was more prevalent within the BA.1 subvariant at time of decision to  
386 progress into clinical development.

387 Our findings from prime/boost studies suggest that CV0501, both as monovalent and bivalent  
388 vaccine, is superior to ancestral N1m $\Psi$  as a booster vaccine concerning the induction of BA.1  
389 specific nAbs. Additionally, monovalent and bivalent CV0501 vaccines cross-neutralized  
390 SARS-CoV-2 ancestral and Delta variants and were advantageous in inducing responses  
391 against Omicron BA.2 and BA.5 variants compared with boosting with ancestral N1m $\Psi$ .

392 As expected, priming, and boosting of rats with BA.1 S protein encoding vaccines resulted in  
393 an Omicron focused response with lowest nAb and ACE2 binding inhibition results against  
394 ancestral and Delta compared with all groups primed with ancestral N1m $\Psi$ , irrespective of  
395 subsequent boost. This suggests that vaccines containing variants from the ancestral cluster  
396 should be assessed in immunological naïve individuals, if variants of ancestral origin are  
397 actively circulating.

## Assessment of Immunogenicity and Efficacy of CV0501 mRNA-based Omicron COVID-19 Vaccination in Small Animal Models

398 Our monovalent and bivalent CV0501 vaccines induced comparable nAb responses against  
399 Omicron subvariants, although only half the dose in the bivalent vaccine encodes BA.1 S  
400 protein. Our data demonstrated that boosting with bivalent CV0501/ancestral N1mΨ vaccine  
401 upon ancestral N1mΨ priming resulted in a tendency towards increased cross-neutralization  
402 of ancestral and Delta variants compared with boosting with CV0501 alone. Overall, our data  
403 point towards a potential benefit of bivalent vaccination for inducing a broad immune response.  
404 Similarly, previous mRNA vaccine studies in mice on an ancestral primed background  
405 demonstrated a broadening of immune responses upon boosting with ancestral/BA.1 bivalent  
406 vaccines compared with monovalent preparations [32,33].

407 Assessment of the monovalent CV0501 vaccine in a hamster challenge model demonstrated  
408 that CV0501 (at both 8 µg and 24 µg doses) protects against challenge with Omicron BA.2 by  
409 reducing weight loss, and significantly decreasing viral load in the lungs to levels below or  
410 around the lower limit of detection compared with sham-immunized controls. Viral genome  
411 copies in the nose (representative of viral shedding) were significantly reduced but remained  
412 higher than levels observed in the lungs. In general, protection in the nose is more difficult to  
413 achieve than in the lower respiratory tract, which is more pronounced following heterologous  
414 compared with homologous virus challenge infection [34-37]. Indeed, differences in the BA.1  
415 and BA.2 S protein sequence that affect nAb generation may have impacted protection of  
416 the nose. BA.2 contains eight unique changes that are not present in BA.1. These mutations  
417 are located in the N-terminal domain (NTD) and the RBD, both known target regions for nAbs.  
418 In line with this, previous studies reported only partial protection against reinfection with BA.2  
419 upon previous infection with BA.1 in Syrian hamsters [38]. Overall, results in hamsters  
420 demonstrated protective efficacy of CV0501 against BA.1 and BA.2 SARS-CoV-2 in a widely  
421 accepted animal model for SARS-CoV-2 infection model [39].

### 422 **Conclusions**

423 Overall, vaccination with the SARS-CoV-2 BA.1 vaccine, CV0501, elicited robust  
424 dose-dependent levels of nAbs against homologous BA.1 and other variants of SARS-CoV-2  
425 in small animals. Importantly, CV0501 induced cross-nAbs against SARS-CoV-2 BA.5, a  
426 recommended vaccine component, and demonstrated potential as both a monovalent and  
427 bivalent vaccine candidate. CV0501 challenge studies in hamsters displayed a significant  
428 reduction of viral mRNA levels in the airways after challenge infection with BA.2, compared  
429 with the control. Based on these promising preclinical results, CV0501 has progressed into  
430 Phase 1 clinical trials in humans to assess suitability as a monovalent vaccine candidate  
431 (ClinicalTrials.gov Identifier: NCT05477186).

## Assessment of Immunogenicity and Efficacy of CV0501 mRNA-based Omicron COVID-19 Vaccination in Small Animal Models

### Author Contributions

Conceptualization, N.R, J.G, K.K, D.H, M.B, D.M, B.P, S.R; methodology, N.R, D.H, M.B, B.P, S.R; validation, D,H, M.B; formal analysis, N.R; investigation, N.R, L.U, J.S, N.J.H, C.F, B.C, D.H; resources, N.R, B.P, S.R; data curation, N.J.H; writing—original draft preparation, N.R, D.H.; writing—review and editing, N.R, J.G, K.K, S.O.M, N.J.H, C.F, B.C, A.D, M.B, D.M, B.P S.R; visualization, N.R, N.J.H.; supervision, N.R, S.O.M, A.D, D.H, M.B, D.M, B.P, S.R; project administration, N.R, A.D, B.P. S.R; funding acquisition, S.O.M, A.D, M.B, B.P.

All authors have read and agreed to the published version of the manuscript.

### Funding

CV0501 is codeveloped by CureVac SE and GSK

### Institutional Review Board Statement

The animal studies were conducted in accordance with German laws and guidelines for animal welfare. The protocol for the rat studies received the appropriate local and national ethics committees' approvals (2347-5-2021 LAVG Brandenburg) and the protocol for the hamster studies was approved by the ethics committee of the State Office of Agriculture, Food safety, and Fishery in Mecklenburg – Western Pomerania (LALLF M-V: 7221.3-1-036/21).

### Informed Consent Statement

Not applicable.

### Data Availability Statement

The data presented in this study are available on request from the corresponding author. The data are not publicly available due to intellectual property rights.

### Acknowledgments

Thanks to Friederike Naumann, Simone Odau and Jonas Fuener (preclinics Gesellschaft für präklinische Forschung mbH) for conducting the study, their outstanding work, commitment, and expertise. Special thanks to Prof. Emanuele Montomoli, Giulia Lapini and the Vismederi team for performing excellent work on virus neutralizing antibody assays. Very special thanks to Julia Führer, Julia Schröder, Nathalie Simon and Sonja Heidü for their work performing



## Assessment of Immunogenicity and Efficacy of CV0501 mRNA-based Omicron COVID-19 Vaccination in Small Animal Models

experiments, Annette Moebes, Nina Schneck, Jessica Wild and Michaela Trapp for their relentless support in the lab. Many thanks to Wolfgang Große, Diego Chavez Moreno and Dominik Vahrenhorst for their bioinformatic expertise and variant sequence analysis.

We would also like to thank Laura Neill and Adam Taylor (Alchemy Medical Writing, UK; funded by CureVac SE and GSK) and Margaret Haugh (CureVac SE) for medical writing and editorial services and Krystal Evans (GSK) for helpful comments.

### **Conflicts of Interest**

N.R, J.G, K.K, S.O.M, B.P and S.R. are employees of CureVac SE, Tübingen, Germany, a publicly listed company developing mRNA-based vaccines and immunotherapeutics. NR, B.P, and S.O.M hold company shares. D.M holds company share in GSK. S.R., B.P. and N.R. are inventors on several patents on mRNA vaccination and use thereof. All other authors declare no conflicts of interest.

**Table 1: Overview of mutations and mRNA-LNP vaccines used**

| Name             | Encoded SARS-Cov-2 variant | mRNA modification | AA mutations in the spike protein* (compared with ancestral)                                                                                       | AA mutations specific to the RBD region (compared with ancestral)                  |
|------------------|----------------------------|-------------------|----------------------------------------------------------------------------------------------------------------------------------------------------|------------------------------------------------------------------------------------|
| CV0501           | BA.1<br>(12 RBD mutations) | N1mΨ              | A67V, del69-70, T95I, G142D, del143-145, del211, L212I, ins214EPE, T547K, D614G, H655Y, N679K, P681H, N764K, D796Y, N856K, Q954H, N969K and L981F. | G339D, S371L, S373P, S375F, S477N, T478K, E484A, Q493R, G496S, Q498R, N501Y, Y505H |
| BA.1 nonclinical | BA.1<br>(15 RBD mutations) | N1mΨ              | A67V, del69-70, T95I, G142D, del143-145, del211, L212I, ins214EPE, T547K, D614G, H655Y, N679K, P681H, N764K, D796Y, N856K, Q954H, N969K and L981F. | As above but with 3 additional mutations: K417N, N440K and G446S                   |
| Ancestral        | Ancestral                  | N1mΨ              | -                                                                                                                                                  | -                                                                                  |

AA, amino acid; LNP, lipid nanoparticle; N1mΨ, N1-methylpseudouridine; mRNA, messenger ribonucleic acid; RBD, receptor binding domain; SARS-CoV-2, severe acute respiratory syndrome coronavirus-2.

\*Not including AA mutations in the RBD

**Table 2: Analyses of median nAb production against SARS-CoV-2 variant BA.1 after booster vaccination with CV0501 alone, ancestral N1mΨ alone or bivalent CV0501/ancestral N1mΨ**

| Group | 1 <sup>st</sup> prime (Day 0)<br>2 <sup>nd</sup> prime (Day 21) | 1 <sup>st</sup> boost (Day 105)<br>2 <sup>nd</sup> boost (Day 189) | Dose concentration | Median nAb titers |        |                          |         |         |                            |         |         |                            |
|-------|-----------------------------------------------------------------|--------------------------------------------------------------------|--------------------|-------------------|--------|--------------------------|---------|---------|----------------------------|---------|---------|----------------------------|
|       |                                                                 |                                                                    |                    | Day 21            | Day 42 | Fold-increase Days 21–42 | Day 105 | Day 133 | Fold-increase Days 105-133 | Day 189 | Day 217 | Fold-increase Days 189–217 |
| 1     | Ancestral N1mΨ                                                  | CV0501                                                             | 2 µg               | 8                 | 273    | <b>36</b>                | 137     | 773     | <b>5.6</b>                 | 386     | 2450    | <b>6.3</b>                 |
|       |                                                                 |                                                                    | 8 µg               | 34                | 2560   | <b>75</b>                | 1810    | 2185    | <b>1.2</b>                 | 1810    | 5430    | <b>3.0</b>                 |
| 2     | Ancestral N1mΨ                                                  | CV0501/<br>ancestral N1mΨ                                          | 2 µg               | 12                | 1093   | <b>91</b>                | 480     | 905     | <b>1.9</b>                 | 546     | 1545    | <b>2.8</b>                 |
|       |                                                                 |                                                                    | 8 µg               | 113               | 7241   | <b>64</b>                | 1920    | 3090    | <b>1.6</b>                 | 1545    | 6180    | <b>4.0</b>                 |
| 3     | Ancestral N1mΨ                                                  | Ancestral N1mΨ                                                     | 2 µg               | 5                 | 170    | <b>34</b>                | 160     | 240     | <b>1.5</b>                 | 160     | 453     | <b>2.8</b>                 |
|       |                                                                 |                                                                    | 8 µg               | 24                | 1810   | <b>75</b>                | 960     | 1358    | <b>1.4</b>                 | 1092    | 2185    | <b>2.0</b>                 |
| 4     | BA.1 nonclinical                                                | CV0501                                                             | 2 µg               | 773               | 7241   | <b>9</b>                 | 4370    | 5120    | <b>1.2</b>                 | 3620    | 8740    | <b>2.4</b>                 |
|       |                                                                 |                                                                    | 8 µg               | 1280              | 12361  | <b>10</b>                | 4370    | 10240   | <b>2.3</b>                 | 5120    | 17481   | <b>3.4</b>                 |

N1mΨ, N1-methylpseudouridine; nAb, neutralizing antibody; SARS-CoV-2, severe acute respiratory syndrome coronavirus-2.

**Table 3: Analyses of median nAb production against SARS-CoV-2 variants after booster vaccination with CV0501 alone, ancestral N1mΨ alone, or bivalent CV0501/ancestral N1mΨ**

|       |                                                                 |                                 |                                 |                    | Median nAb titers vs SARS-CoV-2 variants on Day 217 |       |          |       |      |
|-------|-----------------------------------------------------------------|---------------------------------|---------------------------------|--------------------|-----------------------------------------------------|-------|----------|-------|------|
| Group | 1 <sup>st</sup> prime (Day 0)<br>2 <sup>nd</sup> prime (Day 21) | 1 <sup>st</sup> boost (Day 105) | 2 <sup>nd</sup> boost (Day 189) | Dose concentration | Ancestral                                           | Delta | BA.1     | BA.2  | BA.5 |
| 1     | Ancestral N1mΨ                                                  | Ancestral N1mΨ                  | Ancestral N1mΨ                  | 2 µg               | 3620                                                | 5120  | 452      | 1810  | 1280 |
|       |                                                                 |                                 |                                 | 8 µg               | 8740                                                | 7241  | 2185     | 5120  | 1545 |
| 2     | Ancestral N1mΨ                                                  | CV0501                          | CV0501                          | 2 µg               | 1093                                                | 2560  | 2450     | 4370  | 1093 |
|       |                                                                 |                                 |                                 | 8 µg               | 4370                                                | 8740  | 5431     | 10240 | 5431 |
| 3     | Ancestral N1mΨ                                                  | Bivalent CV0501/ancestral N1mΨ  | Bivalent CV0501/ancestral N1mΨ  | 2 µg               | 7241                                                | 5120  | 1545     | 6180  | 1810 |
|       |                                                                 |                                 |                                 | 8 µg               | 10240                                               | 12361 | 6180     | 12361 | 5120 |
| 4     | BA.1 nonclinical                                                | CV0501                          | CV0501                          | 2 µg               | 226                                                 | 546   | 8740.4   | 7241  | 1280 |
|       |                                                                 |                                 |                                 | 8 µg               | 960                                                 | 3090  | 17480.75 | 14482 | 5120 |

N1mΨ, N1-methylpseudouridine; nAb, neutralizing antibody.

## Assessment of Immunogenicity and Efficacy of CV0501 mRNA-based Omicron COVID-19 Vaccination in Small Animal Models

### References

1. World Health Organization. WHO COVID-19 Dashboard. Available online: <https://covid19.who.int/> (accessed on 14 July 2022).
2. World health Organization. <https://www.who.int/activities/tracking-SARS-CoV-2-variants>. Available online: (accessed on 3 January 2023).
3. US FDA. Coronavirus (COVID-19) update: FDA recommends inclusion of Omicron BA.4/5 component for COVID-19 vaccine booster doses. Available online: <https://www.fda.gov/news-events/press-announcements/coronavirus-covid-19-update-fda-recommends-inclusion-omicron-ba45-component-covid-19-vaccine-booster> (accessed on 3 January 2023).
4. Wang, Q.; Iketani, S.; Li, Z.; Liu, L.; Guo, Y.; Huang, Y.; Bowen, A.D.; Liu, M.; Wang, M.; Yu, J.; et al. Alarming antibody evasion properties of rising SARS-CoV-2 BQ and XBB subvariants. *bioRxiv* **2022**, 2022.2011.2023.517532, doi:10.1101/2022.11.23.517532.
5. Alcendor, D.J.; Matthews-Juarez, P.; Smoot, D.; Hildreth, J.E.K.; Lamar, K.; Tabatabai, M.; Wilus, D.; Juarez, P.D. Breakthrough COVID-19 infections in the US: Implications for prolonging the pandemic. *Vaccines (Basel)* **2022**, *10*, doi:10.3390/vaccines10050755.
6. Araf, Y.; Akter, F.; Tang, Y.D.; Fatemi, R.; Parvez, M.S.A.; Zheng, C.; Hossain, M.G. Omicron variant of SARS-CoV-2: Genomics, transmissibility, and responses to current COVID-19 vaccines. *J Med Virol* **2022**, *94*, 1825-1832, doi:10.1002/jmv.27588.
7. McCallum, M.; Czudnochowski, N.; Rosen, L.E.; Zepeda, S.K.; Bowen, J.E.; Walls, A.C.; Hauser, K.; Joshi, A.; Stewart, C.; Dillen, J.R.; et al. Structural basis of SARS-CoV-2 Omicron immune evasion and receptor engagement. *Science* **2022**, *375*, 864-868, doi:10.1126/science.abn8652.
8. Planas, D.; Saunders, N.; Maes, P.; Guivel-Benhassine, F.; Planchais, C.; Buchrieser, J.; Bolland, W.H.; Porrot, F.; Staropoli, I.; Lemoine, F.; et al. Considerable escape of SARS-CoV-2 Omicron to antibody neutralization. *Nature* **2022**, *602*, 671-675, doi:10.1038/s41586-021-04389-z.
9. Gopinath, S.; Ishak, A.; Dhawan, N.; Poudel, S.; Shrestha, P.S.; Singh, P.; Xie, E.; Tahir, P.; Marzaban, S.; Michel, J.; et al. Characteristics of COVID-19 breakthrough infections among vaccinated individuals and associated risk factors: A systematic review. *Trop Med Infect Dis* **2022**, *7*, 81.
10. Al-Otaiby, M.; Krissaane, I.; Al Seraihi, A.; Alshenaifi, J.; Qahtani, M.H.; Aljeri, T.; Zaatari, E.; Hassanain, M.; Algwizani, A.; Albarrag, A.; et al. SARS-CoV-2 reinfection rate and outcomes in Saudi Arabia: A national retrospective study. *Int J Infect Dis* **2022**, *122*, 758-766, doi:10.1016/j.ijid.2022.07.025.

## Assessment of Immunogenicity and Efficacy of CV0501 mRNA-based Omicron COVID-19 Vaccination in Small Animal Models

11. Grabowski, F.; Kochańczyk, M.; Lipniacki, T. The spread of SARS-CoV-2 variant Omicron with a doubling time of 2.0-3.3 days can be explained by immune evasion. *Viruses* **2022**, *14*, doi:10.3390/v14020294.
12. Shaheen, N.A.; Sambas, R.; Alenezi, M.; Alharbi, N.K.; Aldibasi, O.; Bosaeed, M. COVID-19 reinfection: A multicenter retrospective study in Saudi Arabia. *Ann Thorac Med* **2022**, *17*, 81-86, doi:10.4103/atm.atm\_74\_22.
13. Bowe, B.; Xie, Y.; Al-Aly, Z. Acute and postacute sequelae associated with SARS-CoV-2 reinfection. *Nat Med* **2022**, *28*, 2398-2405, doi:10.1038/s41591-022-02051-3.
14. Baden, L.R.; El Sahly, H.M.; Essink, B.; Kotloff, K.; Frey, S.; Novak, R.; Diemert, D.; Spector, S.A.; Rouphael, N.; Creech, C.B.; et al. Efficacy and safety of the mRNA-1273 SARS-CoV-2 vaccine. *N Engl J Med* **2020**, *384*, 403-416, doi:10.1056/NEJMoa2035389.
15. Polack, F.P.; Thomas, S.J.; Kitchin, N.; Absalon, J.; Gurtman, A.; Lockhart, S.; Perez, J.L.; Pérez Marc, G.; Moreira, E.D.; Zerbini, C.; et al. Safety and efficacy of the BNT162b2 mRNA COVID-19 vaccine. *N Engl J Med* **2020**, *383*, 2603-2615, doi:10.1056/NEJMoa2034577.
16. Fiolet, T.; Kherabi, Y.; MacDonald, C.J.; Ghosn, J.; Peiffer-Smadja, N. Comparing COVID-19 vaccines for their characteristics, efficacy and effectiveness against SARS-CoV-2 and variants of concern: a narrative review. *Clin Microbiol Infect* **2022**, *28*, 202-221, doi:10.1016/j.cmi.2021.10.005.
17. Roth, N.; Schön, J.; Hoffmann, D.; Thran, M.; Thess, A.; Mueller, S.O.; Petsch, B.; Rauch, S. Optimised non-coding regions of mRNA SARS-CoV-2 vaccine CV2CoV improves homologous and heterologous neutralising antibody responses. *Vaccines (Basel)* **2022**, *10*, doi:10.3390/vaccines10081251.
18. Gebre, M.S.; Rauch, S.; Roth, N.; Yu, J.; Chandrashekar, A.; Mercado, N.B.; He, X.; Liu, J.; McMahan, K.; Martinot, A.; et al. Optimization of non-coding regions for a non-modified mRNA COVID-19 vaccine. *Nature* **2022**, *601*, 410-414, doi:10.1038/s41586-021-04231-6.
19. Hoffmann, D.; Corleis, B.; Rauch, S.; Roth, N.; Mühe, J.; Halwe, N.J.; Ulrich, L.; Fricke, C.; Schön, J.; Kraft, A.; et al. CVnCoV and CV2CoV protect human ACE2 transgenic mice from ancestral B BavPat1 and emerging B.1.351 SARS-CoV-2. *Nat Commun* **2021**, *12*, 4048, doi:10.1038/s41467-021-24339-7.
20. Pallesen, J.; Wang, N.; Corbett, K.S.; Wrapp, D.; Kirchdoerfer, R.N.; Turner, H.L.; Cottrell, C.A.; Becker, M.M.; Wang, L.; Shi, W.; et al. Immunogenicity and structures of a rationally designed prefusion MERS-CoV spike antigen. *Proc Natl Acad Sci U S A* **2017**, *114*, E7348-E7357.
21. Durovic, N.; Pillay, M.; Cox, P.H. The stability of 99mTc-DTPA and 99mTc-HIDA following ultrasonic nebulisation. *Eur J Nucl Med* **1988**, *14*, 400-402, doi:10.1007/bf00254392.
22. Reed, L.J.; Muench, H. A simple method of estimating fifty percent endpoints *Am J Epidemiol* **1938**, *27*, 493-497, doi:10.1093/oxfordjournals.aje.a118408.

Assessment of Immunogenicity and Efficacy of CV0501 mRNA-based Omicron COVID-19 Vaccination in Small Animal Models

23. Junker, D.; Dulovic, A.; Becker, M.; Wagner, T.R.; Kaiser, P.D.; Traenkle, B.; Kienzle, K.; Bunk, S.; Struemper, C.; Haeberle, H.; et al. COVID-19 patient serum less potently inhibits ACE2-RBD binding for various SARS-CoV-2 RBD mutants. *Sci Rep* **2022**, *12*, 7168, doi:10.1038/s41598-022-10987-2.
24. Becker, M.; Strengert, M.; Junker, D.; Kaiser, P.D.; Kerrinnes, T.; Traenkle, B.; Dinter, H.; Häring, J.; Ghozzi, S.; Zeck, A.; et al. Exploring beyond clinical routine SARS-CoV-2 serology using MultiCoV-Ab to evaluate endemic coronavirus cross-reactivity. *Nature Communications* **2021**, *12*, 1152, doi:10.1038/s41467-021-20973-3.
25. Junker, D.; Becker, M.; Wagner, T.R.; Kaiser, P.D.; Maier, S.; Grimm, T.M.; Griesbaum, J.; Marsall, P.; Gruber, J.; Traenkle, B.; et al. Antibody binding and angiotensin-converting enzyme 2 binding inhibition is significantly reduced for both the BA.1 and BA.2 Omicron variants. *Clin Infect Dis* **2022**, doi:10.1093/cid/ciac498.
26. Institut Pasteur. Protocol: Real-time RT-PCR assays for the detection of SARS-CoV-2 Available online: [https://www.who.int/docs/default-source/coronaviruse/real-time-rt-pcr-assays-for-the-detection-of-sars-cov-2-institut-pasteur-paris.pdf?sfvrsn=3662fcb6\\_2](https://www.who.int/docs/default-source/coronaviruse/real-time-rt-pcr-assays-for-the-detection-of-sars-cov-2-institut-pasteur-paris.pdf?sfvrsn=3662fcb6_2) (accessed on 3 January 2023).
27. Higdon, M.M.; Baidya, A.; Walter, K.K.; Patel, M.K.; Issa, H.; Espie, E.; Feikin, D.R.; Knoll, M.D. Duration of effectiveness of vaccination against COVID-19 caused by the omicron variant. *Lancet Infect Dis* **2022**, *22*, 1114-1116, doi:10.1016/S1473-3099(22)00409-1.
28. Andrews, N.; Stowe, J.; Kirsebom, F.; Toffa, S.; Rickeard, T.; Gallagher, E.; Gower, C.; Kall, M.; Groves, N.; O'Connell, A.-M.; et al. Covid-19 Vaccine effectiveness against the omicron (B.1.1.529) *N Engl J Med* **2022**, *386*, 1532-1546, doi:10.1056/NEJMoa2119451.
29. Cao, Y.; Wang, J.; Jian, F.; Xiao, T.; Song, W.; Yisimayi, A.; Huang, W.; Li, Q.; Wang, P.; An, R.; et al. Omicron escapes the majority of existing SARS-CoV-2 neutralizing antibodies. *Nature* **2022**, *602*, 657-663, doi:10.1038/s41586-021-04385-3.
30. Liu, L.; Iketani, S.; Guo, Y.; Chan, J.F.W.; Wang, M.; Liu, L.; Luo, Y.; Chu, H.; Huang, Y.; Nair, M.S.; et al. Striking antibody evasion manifested by the Omicron variant of SARS-CoV-2. *Nature* **2022**, *602*, 676-681, doi:10.1038/s41586-021-04388-0.
31. Shrestha, L.B.; Foster, C.; Rawlinson, W.; Tedla, N.; Bull, R.A. Evolution of the SARS-CoV-2 omicron variants BA.1 to BA.5: Implications for immune escape and transmission. *Rev Med Virol* **2022**, *32*, e2381, doi:10.1002/rmv.2381.
32. Scheaffer, S.M.; Lee, D.; Whitener, B.; Ying, B.; Wu, K.; Liang, C.Y.; Jani, H.; Martin, P.; Amato, N.J.; Avena, L.E.; et al. Bivalent SARS-CoV-2 mRNA vaccines increase breadth of neutralization and protect against the BA.5 Omicron variant in mice. *Nat Med* **2022**, doi:10.1038/s41591-022-02092-8.
33. Muik, A.; Lui, B.G.; Bacher, M.; Wallisch, A.K.; Toker, A.; Couto, C.I.C.; Güler, A.; Mampilli, V.; Schmitt, G.J.; Mottl, J.; et al. Exposure to BA.4/5 S protein drives neutralization of Omicron

Assessment of Immunogenicity and Efficacy of CV0501 mRNA-based Omicron COVID-19 Vaccination in Small Animal Models

- BA.1, BA.2, BA.2.12.1, and BA.4/5 in vaccine-experienced humans and mice. *Sci Immunol* **2022**, eade9888, doi:10.1126/sciimmunol.ade9888.
34. Halfmann, P.J.; Kuroda, M.; Maemura, T.; Chiba, S.; Armbrust, T.; Wright, R.; Balaram, A.; Florek, K.R.; Bateman, A.C.; Kawaoka, Y. Efficacy of vaccination and previous infection against the Omicron BA.1 variant in Syrian hamsters. *Cell Rep* **2022**, *39*, 110688, doi:10.1016/j.celrep.2022.110688.
35. van Doremalen, N.; Schulz, J.E.; Adney, D.R.; Saturday, T.A.; Fischer, R.J.; Yinda, C.K.; Thakur, N.; Newman, J.; Ulaszewska, M.; Belij-Rammerstorfer, S.; et al. ChAdOx1 nCoV-19 (AZD1222) or nCoV-19-Beta (AZD2816) protect Syrian hamsters against Beta Delta and Omicron variants. *Nat Commun* **2022**, *13*, 4610, doi:10.1038/s41467-022-32248-6.
36. Fischer, R.J.; van Doremalen, N.; Adney, D.R.; Yinda, C.K.; Port, J.R.; Holbrook, M.G.; Schulz, J.E.; Williamson, B.N.; Thomas, T.; Barbian, K.; et al. ChAdOx1 nCoV-19 (AZD1222) protects Syrian hamsters against SARS-CoV-2 B.1.351 and B.1.1.7. *Nat Commun* **2021**, *12*, 5868, doi:10.1038/s41467-021-26178-y.
37. Corbett, K.S.; Werner, A.P.; Connell, S.O.; Gagne, M.; Lai, L.; Moliva, J.I.; Flynn, B.; Choi, A.; Koch, M.; Foulds, K.E.; et al. mRNA-1273 protects against SARS-CoV-2 beta infection in nonhuman primates. *Nat Immunol* **2021**, *22*, 1306-1315, doi:10.1038/s41590-021-01021-0.
38. Zhou, J.; Sukhova, K.; McKay, P.F.; Kurshan, A.; Yau, Y.; Lechmere, T.; Brown, J.C.; Moshe, M.; Kugasathan, R.; Snell, L.B.; et al. Omicron breakthrough infections in vaccinated or previously infected hamsters. *bioRxiv* **2022**, 2022.2005.2020.492779, doi:10.1101/2022.05.20.492779.
39. Muñoz-Fontela, C.; Widerspick, L.; Albrecht, R.A.; Beer, M.; Carroll, M.W.; de Wit, E.; Diamond, M.S.; Dowling, W.E.; Funnell, S.G.P.; García-Sastre, A.; et al. Advances and gaps in SARS-CoV-2 infection models. *PLoS Pathog* **2022**, *18*, e1010161, doi:10.1371/journal.ppat.1010161.
